# Supplementary material for: Bcor deficiency perturbs erythro-megakaryopoiesis and cooperates with Dnmt3a loss in acute erythroid leukemia onset in mice
Source: PubMed Central journal article supplement (PMC8257496; doi:10.1038/s41375-020-01075-3), 2020-11-06
Supplement: 41375_2020_1075_MOESM1_ESM.pdf [file 41375_2020_1075_MOESM1_ESM.pdf]

## SUPPLEMENTARY METHODS

### Mouse strains

To generate compound *bcor/DNMT3a* (background C57Bl/6) mutant animals, we crossed Knock-out *Bcor* (background C57Bl/6) with *DNMT3a* Knock-out mice (background C57Bl/6) and used the Mx1Cre transgenic line to induce the transgenic activation in hematopoietic stem cells.

Expression of Mx1-Cre and excision of PGK-Neo cassette were induced by polyinosinic-polycytidylic acid (pIpC) treatment in vivo: 8- to 12-week-old mice were injected intraperitoneally with 250 mg/dose pIpC (Sigma-Aldrich, St. Louis, MO) every other day for 3 injections. Mice were analyzed starting 2 months after pIpC induction.

### In vitro hematopoietic colony-forming assay

For in vitro replating assays, a total of  $15 \times 10^3$  BM cells were plated in duplicate in MethoCult M3434 (StemCell Technologies) containing rm SCF, rm IL-3, rh IL-6, rh EPO and grown at 37°C with 5% CO<sub>2</sub>. All colonies were quantified after 10-12 days of growth for detection of BFU-E, CFU-GM, CFU-GEMM in BM.

### Transplant

Congenic Ly.5.1 mice were lethally irradiated (9 Gy) and transplanted with  $2 \times 10^6$  BM cells derived from *Bcor/DNMT3a* leukemic mice as donor cells and  $0.5 \times 10^6$  BM cells from Ly5.1 healthy mice as helper.

### Flow Cytometry and Cell Sorting antibodies and methods

For FACS analysis and cell sorting we used the following eBioscience (Thermo-Fisher scientific) antibodies: FITC-anti-Gr1 (11-5931-85), PE-anti-Mac1 (12-0112-85), APC-anti-cKit (17-1171-83), AlexaFluor780-anti-B220 (47-0452-82), PercP5.5-anti-CD3 (35-0031-82), FITC-anti-Ter119 (11-5921-85), PE-anti-CD41 (12-0411-83), APC-anti-CD71 (17-0711-82), AlexaFluor780-anti-cKit (47-1171-82); BM cells were also stained with PercP5.5-conjugated antibodies against CD3 (35-0031-82), CD4 (45-0042-82), CD8 (45-0081-82), B220 (45-0452-82), Ter119 (45-5921-82), Mac-1 (45-0112-82), Gr-1 (45-5931-80), IL7R (45-1271-82), CD5 (45-0051-82), allophycocyanineFluor-780-conjugated anti-cKit (47-1171-82), FITC-conjugated anti-CD41 (11-0411-85), allophycocyanin-conjugated

anti-FCgR (17-0161-81), PE/CY7-conjugated anti-CD105 (120410, BioLegend), PE-conjugated anti-CD150 (115904, BioLegend), FITC-anti-CD34 (11-0341-85), PE-anti-CD135 (12-1351-83) and PE/CY7-anti-Sca1 (25-5981-82). Multiparameter flow cytometry was used to define and analyze the HSC compartment, including long-term hematopoietic stem cells (LT-HSC; lin-Sca-1+c-kit+ CD34-Flt3-), short-term HSC (ST-HSC; lin-Sca-1+c-kit+CD34+Flt3-) and multipotent progenitors (MPP; lin-Sca-1+c-kit+CD34+Flt3+). In addition, the myeloid progenitors population was included and analyzed as common myeloid progenitors (CMPs Lin-Sca-1-cKit+CD34+FcyRII/IIIlo), granulocyte/monocyte progenitors (GMP Lin-Sca-1-cKit+CD34+FcyRII/IIIhi) and common megakaryocyte-erythroid progenitor (MEP Lin-Sca-1-cKit+CD34-FcyRII/IIIlo) populations.

### **Real time-PCR**

mRNA from sorted LSK cells was extracted with mRNeasy micro kit (Qiagen), retrotranscribed to cDNA using the Superscript IV First-Strand Synthesis System (Invitrogen) and DNMT3a levels were evaluated by qPCR (Applied Biosystem 7300 Real time PCR system). The following primers for Dnmt3a Ex19 F: TTTGAGTTCTACCGCCTCCT and Dnmt3a Ex20 R: GTGTGCAGCAGACACTTCTT were used. Beta-Actin was used for normalization and  $\Delta\Delta C_t$  formula used to calculate mRNA fold change.

### **Gene expression profiling human/mice**

For the comparison between humans and mice, data from patients of AEL were taken into consideration, selecting patients with genotypes similar to those of the mouse and comparing them with healthy controls<sup>47</sup>. (Supp.Fig11) Starting from the CPM values, the differential analysis was performed using a T-test between AEL patients and controls and a Fold Change was calculated considering the difference of logarithms based on the averages of the two populations. The results were filtered by p-value (0.05), so that they could be compared with those identified in the mouse and filtered in the same way.

### **Statistical analysis**

For survival studies, we used the method of Kaplan and Meier with a follow-up of 20 mice per genotype. For studies in which animals are sacrificed for analysis at different ages, we analyzed the data using "analysis of variance". For *in vitro* assays, we utilized a standard

Students t-test. Statistical analysis was carried out on at least three independent experiments.

## Supplementary figure legends:

**Supplementary Figure1: A)** Schematic representation of the recombined allele screening strategy. **B)** Southern blot analysis on ES cells, showing the homologous recombination occurred. **C) (i)** PCR genotyping strategy for the mutated *Bcor* allele and WT from a DNA WT, heterozygous *Bcor*<sup>+/-</sup> and homozygous *Bcor*<sup>-/-</sup> mice. WT fragment 301 bp *Bcor* recombination 393 bp. **(ii)** Top, PCR strategy showing the occurred recombination in *Bcor* locus in the BM; middle, PCR strategy identifying CRE<sup>+</sup> and CRE<sup>-</sup> (WT) mice. 200 bp. Bottom, PCR strategy showing the mutated *Bcor* allele (393 bp) and WT (301 bp) in the BM of WT, heterozygous *Bcor*<sup>+/-</sup> and homozygous *Bcor*<sup>-/-</sup> mice.

**Supplementary Figure2: A) (i)** *Bcor* mRNA sequence in WT and *Bcor* knock-out mice. **(ii)** Western blot analysis of *Bcor* expression in BM of *Bcor*<sup>-/-</sup> and *Bcor*<sup>+/+</sup> mice and positive control OCI/AML3. \* p<0.05, unpaired t-test with Welch's correction

**Supplementary Figure3: A)** Leukopenia was mainly attributed to reduced numbers of B lymphocytes. **(i)** WBC changes in 12 months in PB of *Bcor*<sup>-/-</sup>, *Bcor*<sup>+/-</sup> and WT mice. White blood cells (WBC) **(ii)**, B220<sup>+</sup> **(iii)**, GR1<sup>+</sup>MAC1<sup>+</sup> and CD3<sup>+</sup> **(iv)** number of cells in PB of *Bcor*<sup>-/-</sup>, *Bcor*<sup>+/-</sup> and WT from 6-12 months old mice. **(v)** Total number of B220<sup>+</sup> cells in BM of *Bcor*<sup>-/-</sup>, *Bcor*<sup>+/-</sup> and WT mice. **B)** PLT changes in 12 months in PB OF of *Bcor*<sup>-/-</sup>, *Bcor*<sup>+/-</sup> and WT mice. **C)** PLT number **(i)** and ratio between basal (pre PIPC induction) and time point **(ii)** in in PB of *Bcor*<sup>-/-</sup>, *Bcor*<sup>+/-</sup> and WT mice. \* p<0.05, \*\* p<0.01 \*\*\* p<0.001; unpaired t-test with Welch's correction.

**Supplementary Figure4: A)** Schematic representation of *Bcor* mRNA sequence in wild type, *Bcor*<sup>-/-</sup>, *Dnmt3a*<sup>-/-</sup> and *Bcor*<sup>-/-</sup>*Dnmt3a*<sup>-/-</sup> mice. **B)** Schematic representation of *Dnmt3a* mRNA sequence in wild type, *Bcor*<sup>-/-</sup>, *Dnmt3a*<sup>-/-</sup> and *Bcor*<sup>-/-</sup>*Dnmt3a*<sup>-/-</sup> mice. **C)** Real time-PCR reveals reduction of *Dnmt3a* mRNA levels in *Bcor*<sup>-/-</sup>*Dnmt3a*<sup>-/-</sup> pre-leukemic LSK cells compared to WT.

**Supplementary Figure5: A) (i)** PB smear showing the blasts presence in leukemic *Bcor*<sup>-/-</sup>*Dnmt3a*<sup>-/-</sup> mice compared to WT. **(ii)** Spleen cytopsin in leukemic *Bcor*<sup>-/-</sup>*Dnmt3a*<sup>-/-</sup> and WT control mice, showing the blasts presence. 400X of magnification. **B)** Hematoxylin and eosin in Spinal bone marrow in leukemic *Bcor*<sup>-/-</sup>*Dnmt3a*<sup>-/-</sup> and WT control mice, showing the blasts infiltration 100X **(i)** and 400X **(ii)** of magnification. **C) (i)** Hematoxylin and eosin

in lung of leukemic *Bcor<sup>-/-</sup>Dnmt3a<sup>-/-</sup>* and WT control mice, showing the blasts presence. 100X of magnification and 400X (ii).

**Supplementary Figure6: A-B)** Time course of colony forming unit (A) and total number of cells (B) from mouse BM cells, plated in equal number for each genotype ( $0,15 \times 10^5$ ) in semi solid stem cells methocult. CFU were counted every 14 days.

**Supplementary Figure7:** Total number of LSK (left panel) ( $\text{Lin}^-/\text{Sca1}^+/\text{Kit}^+$ ) and LK (right panel) ( $\text{Lin}^-/\text{Sca1}^+/\text{Kit}^-$ ) in BM of *Bcor<sup>-/-</sup>Dnmt3a<sup>-/-</sup>*, *Bcor<sup>-/-</sup>*, *Dnmt3a<sup>-/-</sup>* and WT mice (n= 16, 12, 10, 9). \*  $p < 0.05$ , \*\*  $p < 0.01$ ; \*\*\*  $p < 0.001$  unpaired t-test with Welch's correction.

**Supplementary Figure8: A)** Flow cytometry (left) and total number (right) of  $\text{Ter119}^{\text{med}}\text{CD71}^{\text{hi}}$  (pro Erythroblast),  $\text{Ter119}^{\text{hi}}\text{CD71}^{\text{hi}}$  (Early Basophilic),  $\text{Ter119}^{\text{hi}}\text{CD71}^{\text{med}}$  (Late Basophilic) and  $\text{Ter119}^{\text{hi}}\text{CD71}^{\text{low}}$  (Chromatophilic and Orthochromatophilic) represented as I, II, III, and IV, respectively in BM of *Bcor<sup>-/-</sup>Dnmt3a<sup>-/-</sup>* (pre Leukemic and leukemic), *Bcor<sup>-/-</sup>*, *Dnmt3a<sup>-/-</sup>* and WT. \*  $p < 0.05$ , \*\*  $p < 0.01$ , \*\*\*  $p < 0.001$ ; unpaired t-test with Welch's correction

**SupplementaryFigure9: (A)** Overlap of differently gene expression (RNA seq) in the MEP cells of *Bcor<sup>-/-</sup>Dnmt3a<sup>-/-</sup>*, *Dnmt3a<sup>-/-</sup>* and *Bcor<sup>-/-</sup>* compared to WT control (n=3 mice for each genotype). **B)** mRNA expression in the MEP cells of the indicated genotypes for the most up and down regulated genes **C)** Heatmaps of Apoptosis pathway (left), cell cycle (middle left), Cancer (middle right) and Oxidative phosphorylation (right) in MEP cell for the indicated genotype.

**SupplementaryFigure10: A-B)** Overlap of the differently gene expressed, up regulated **(A)** and down regulated **(B)** in the human AEL (n=137) and mouse *Bcor<sup>-/-</sup>Dnmt3a<sup>-/-</sup>* (n=3) LSK cells. 137 Human AEL were compared with 7 healthy patients, while *Bcor<sup>-/-</sup>Dnmt3a<sup>-/-</sup>* (n=3) LSK cells were compare with LSK cells derived from 3 WT control mice.

**SupplementaryFigure11: A)** The samples were analyzed by PCA to establish the level of clustering and, as a result, three samples were excluded from AEL patients and one from controls to obtain two populations as homogeneous as possible.



**A**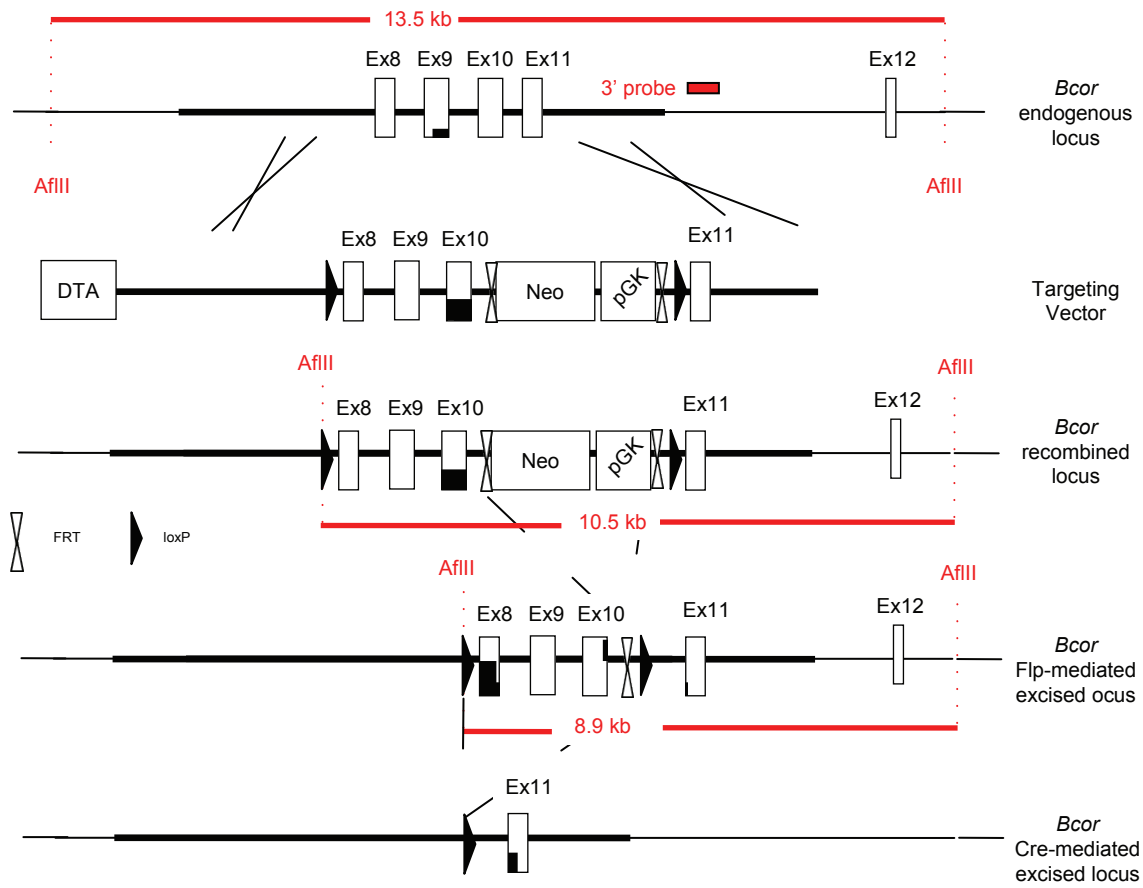**B**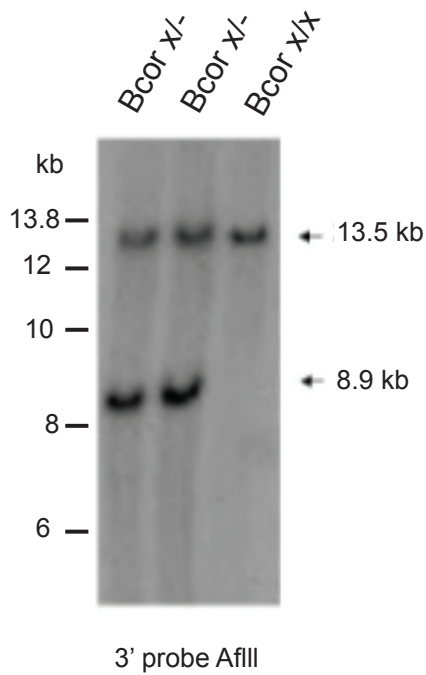**C**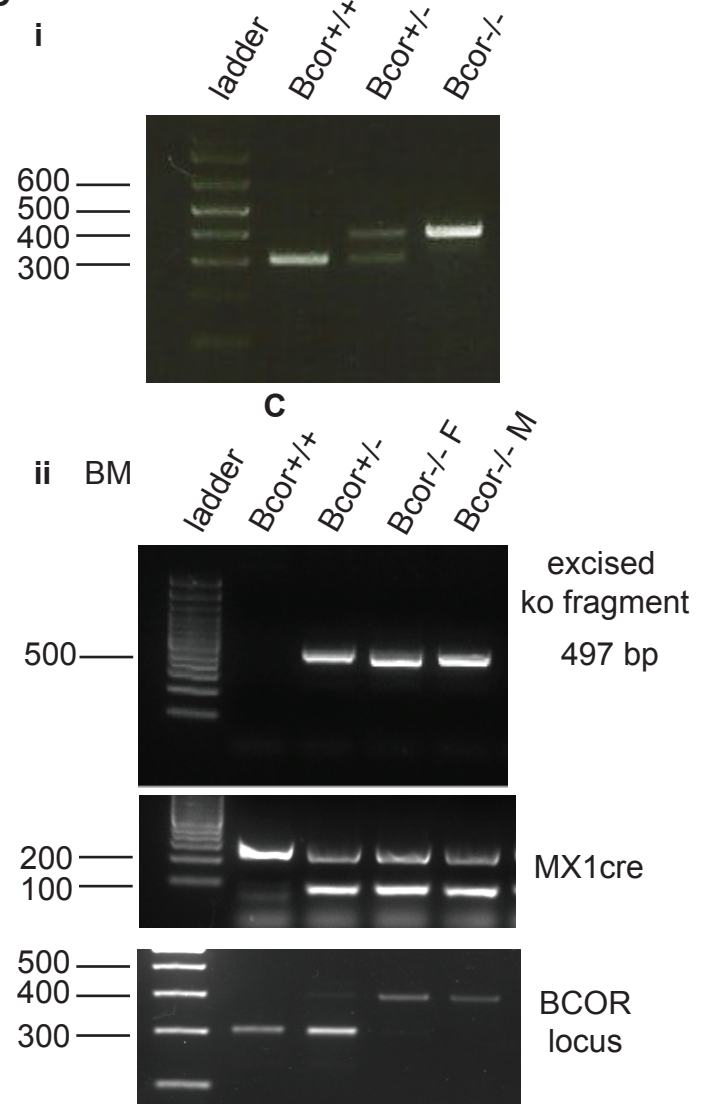**Supplementary Figure 1.**

**A**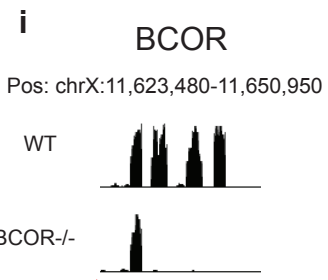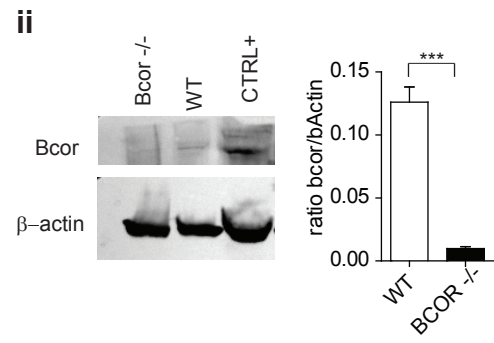

**Supplementary Figure 2.**



**A**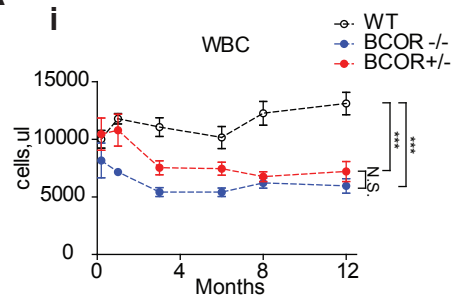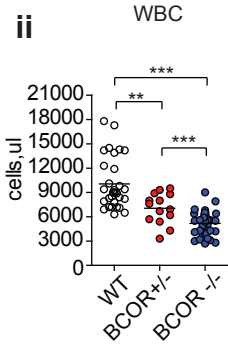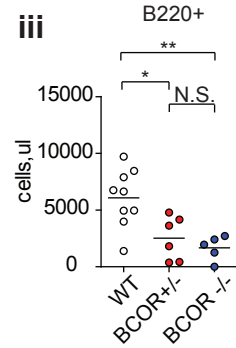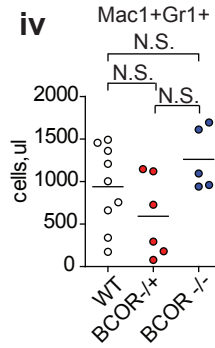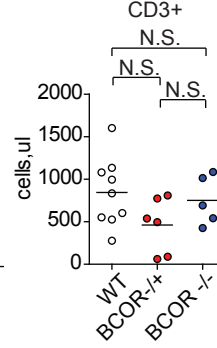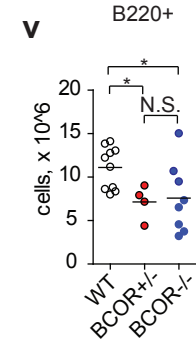**B**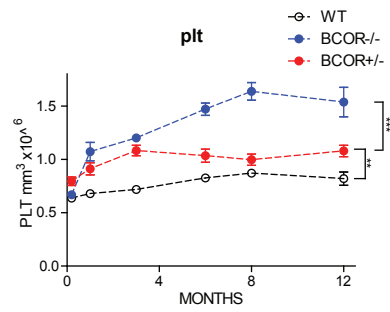**C**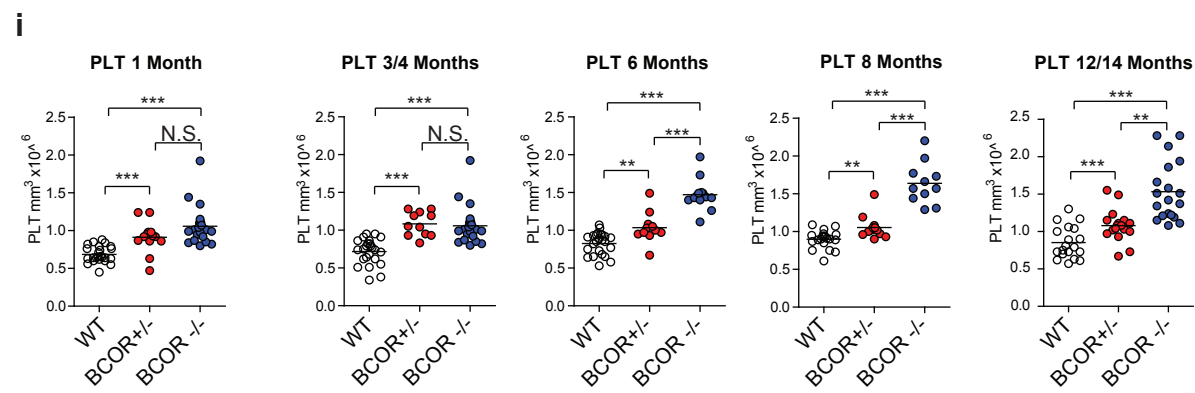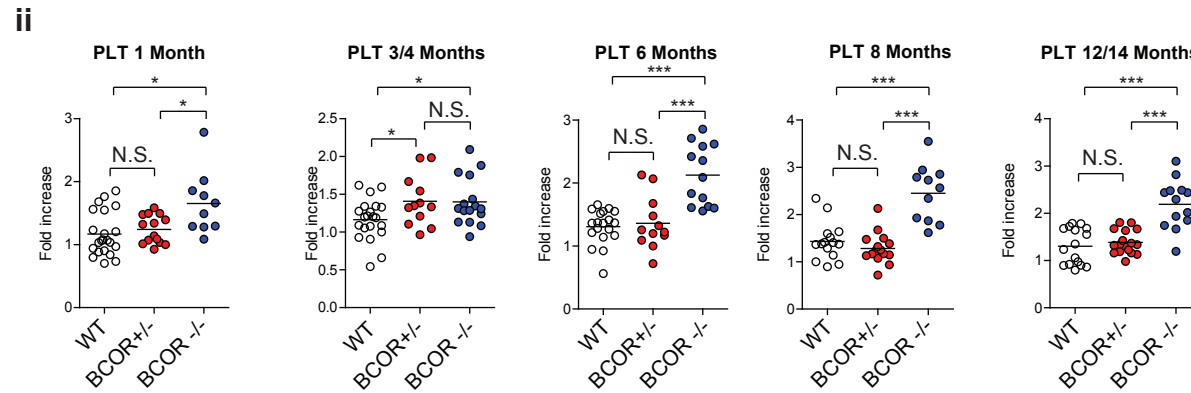**Supplementary Figure 3.**

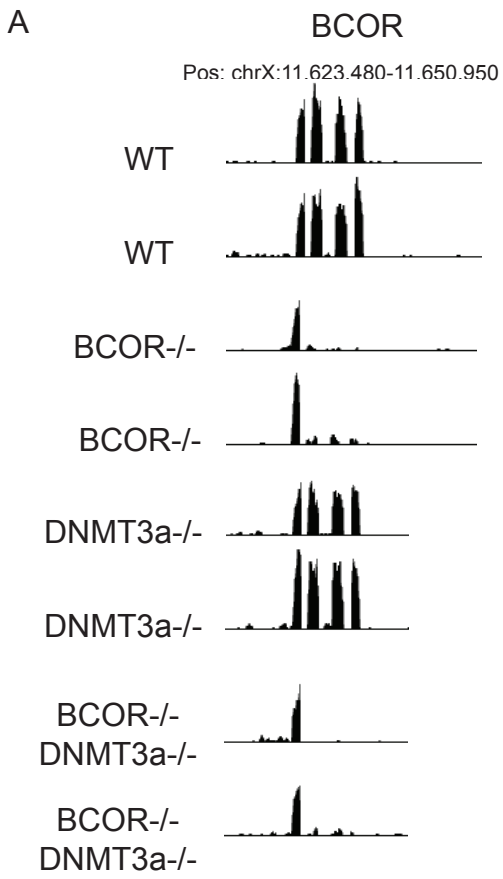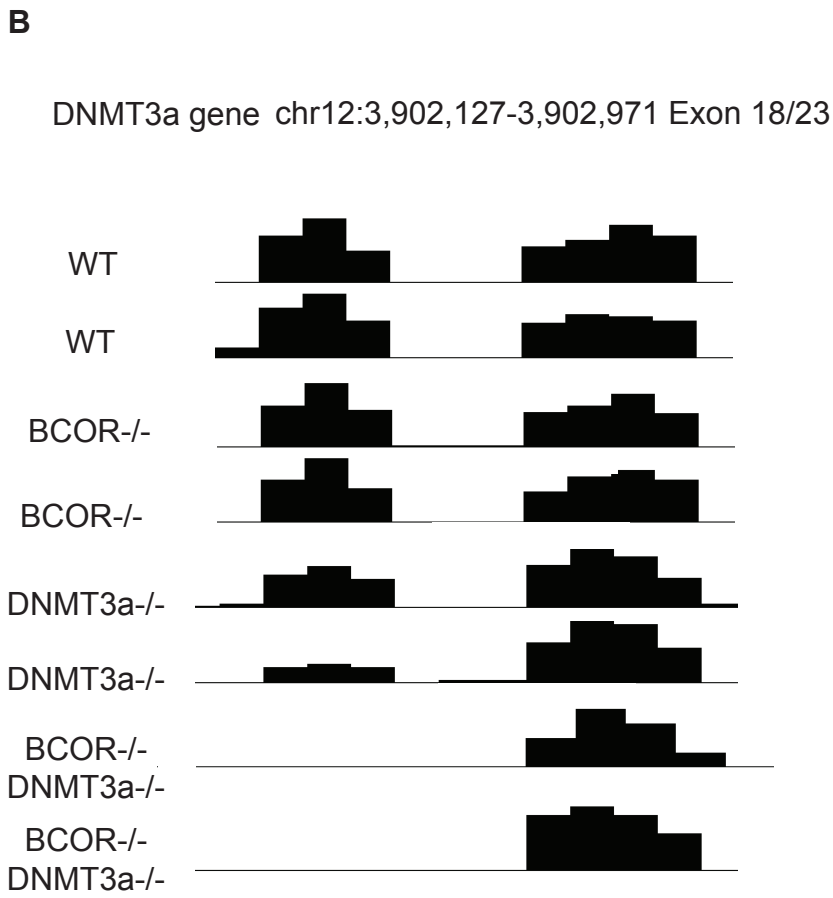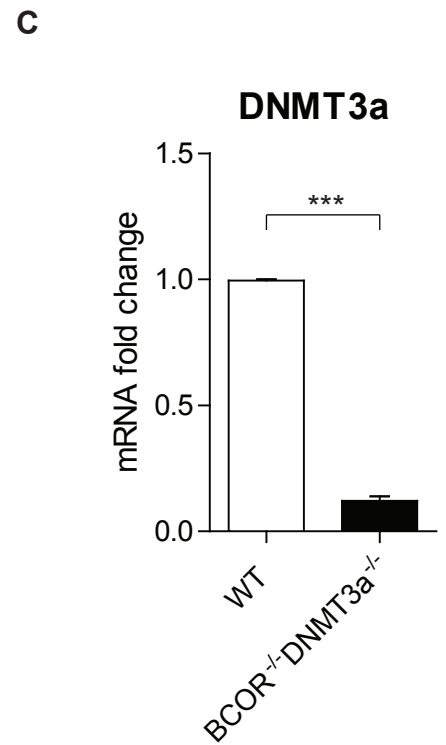

Supplementary Figure 4.

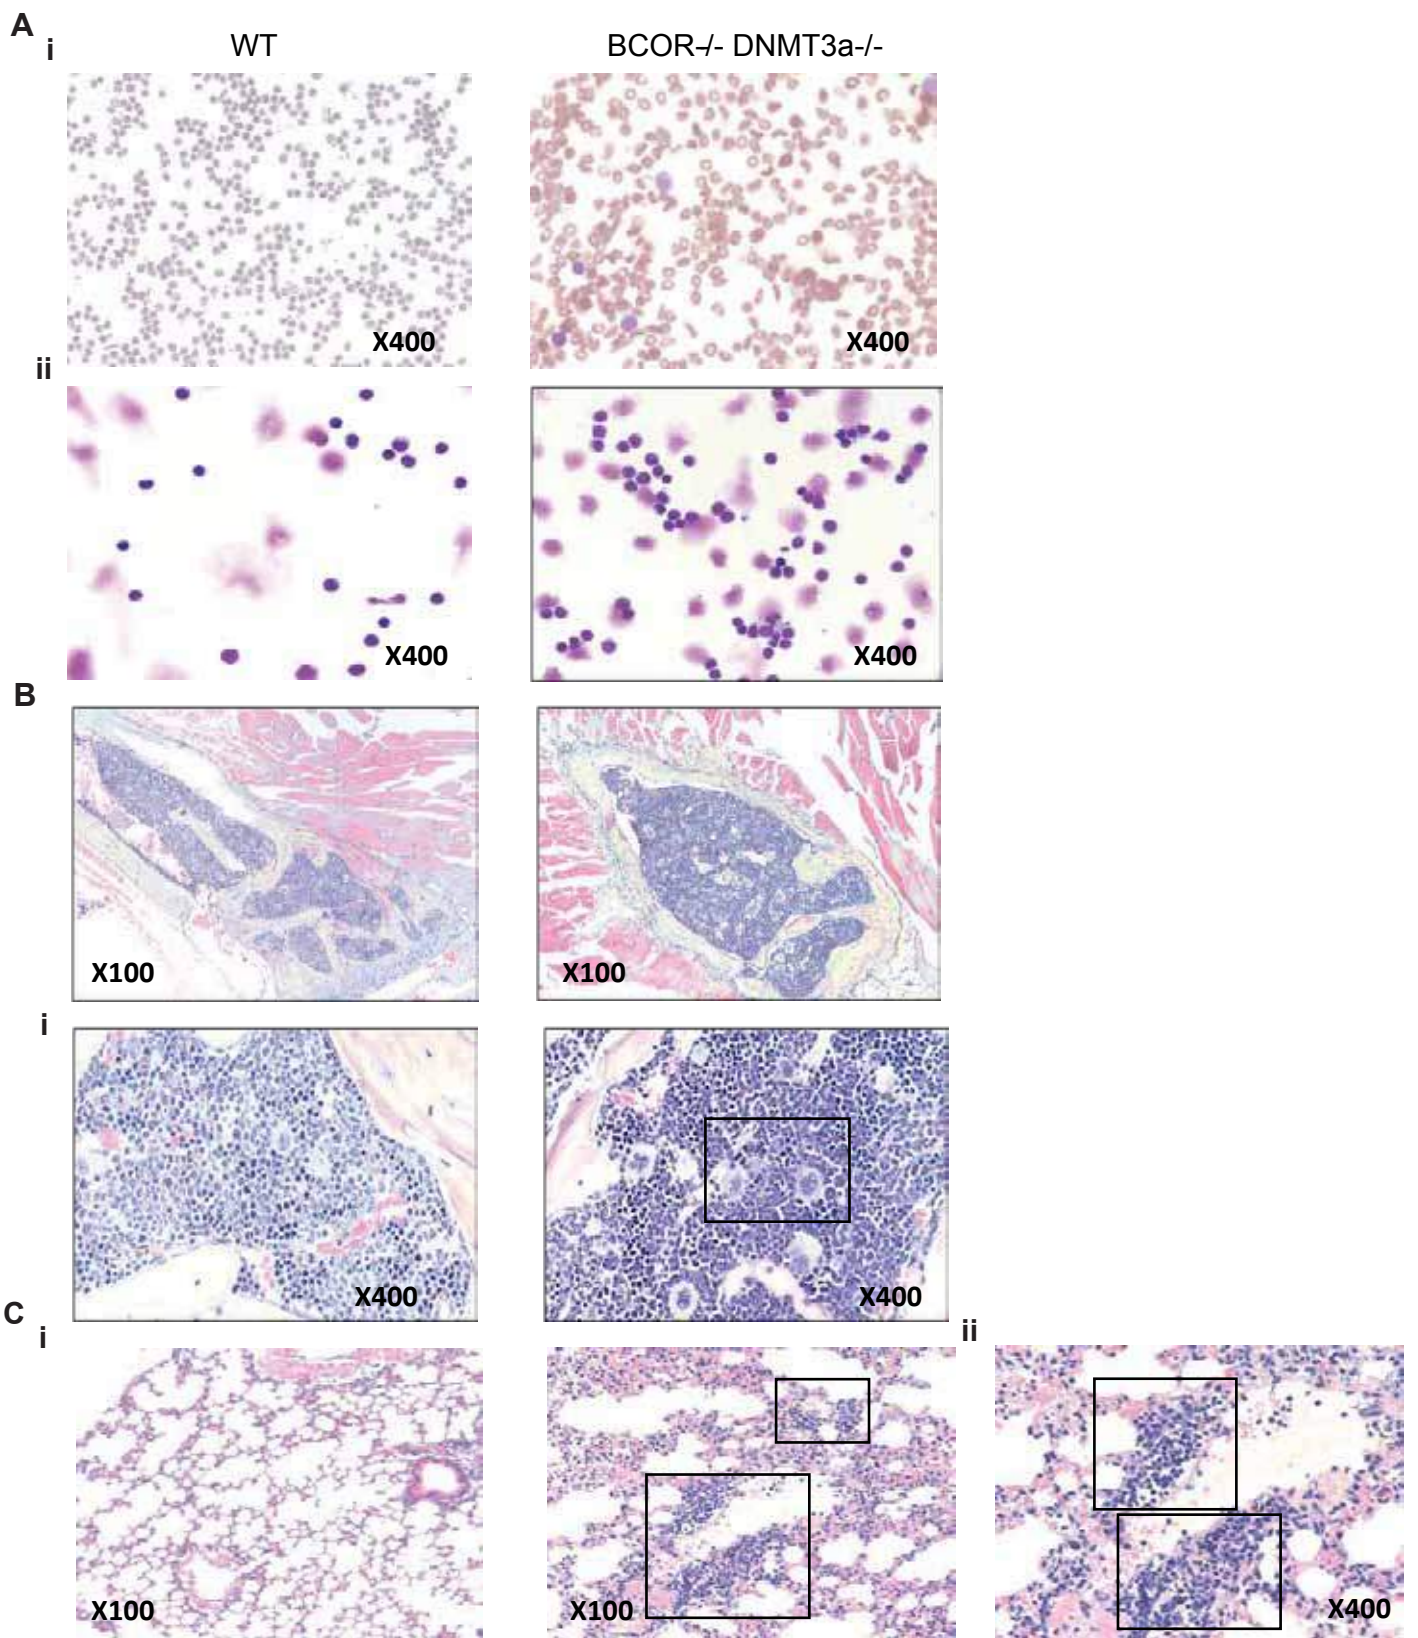

Supplementary Figure 5.

**A**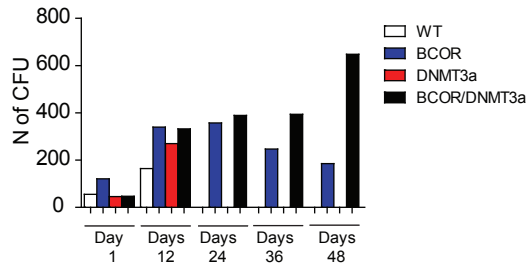**B**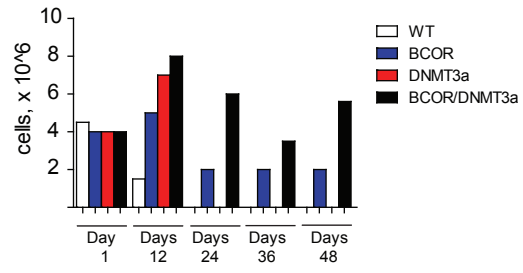**Supplementary Figure 6.**

A

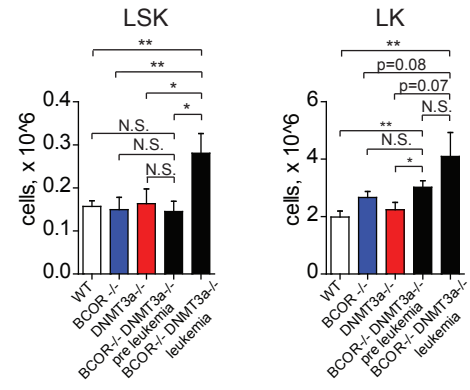

Supplementary figure 7.

**A**

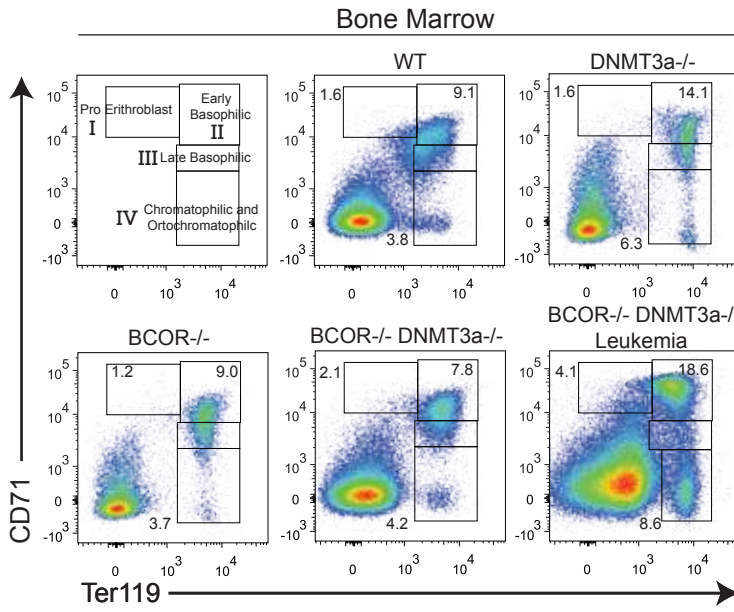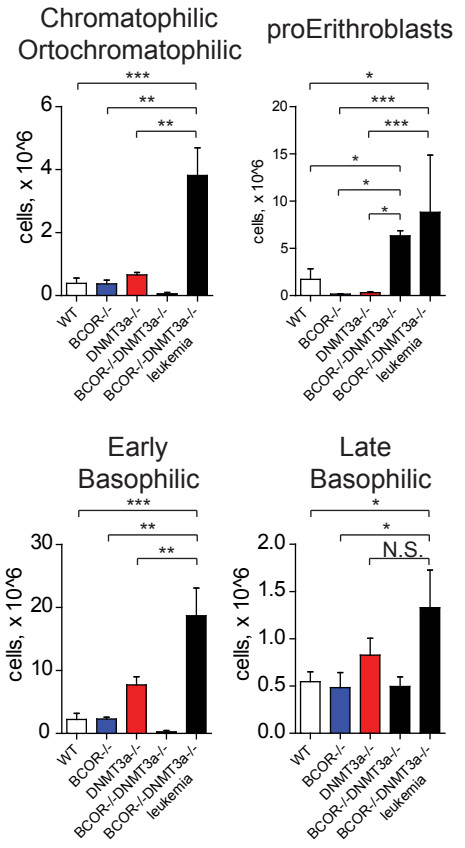

**Supplementary figure 8.**

**A**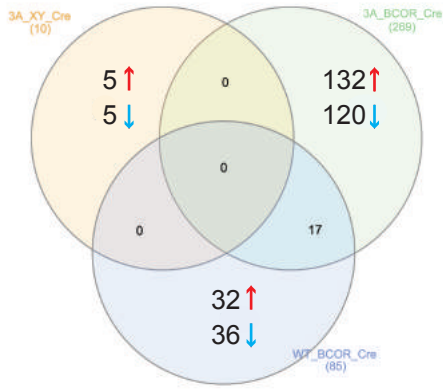**B**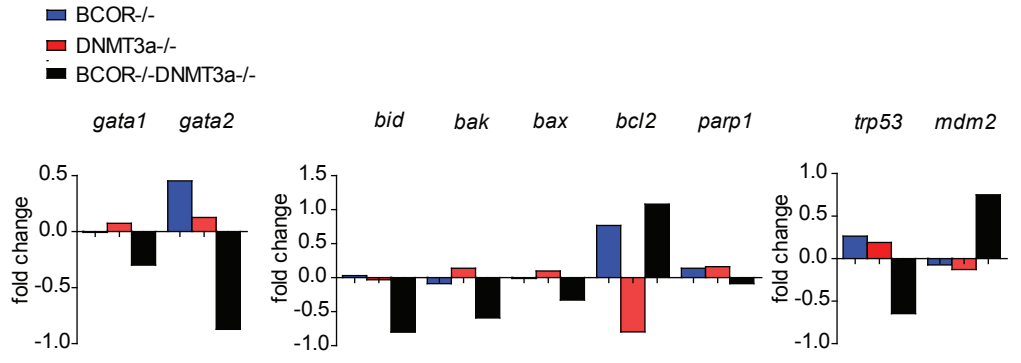**C**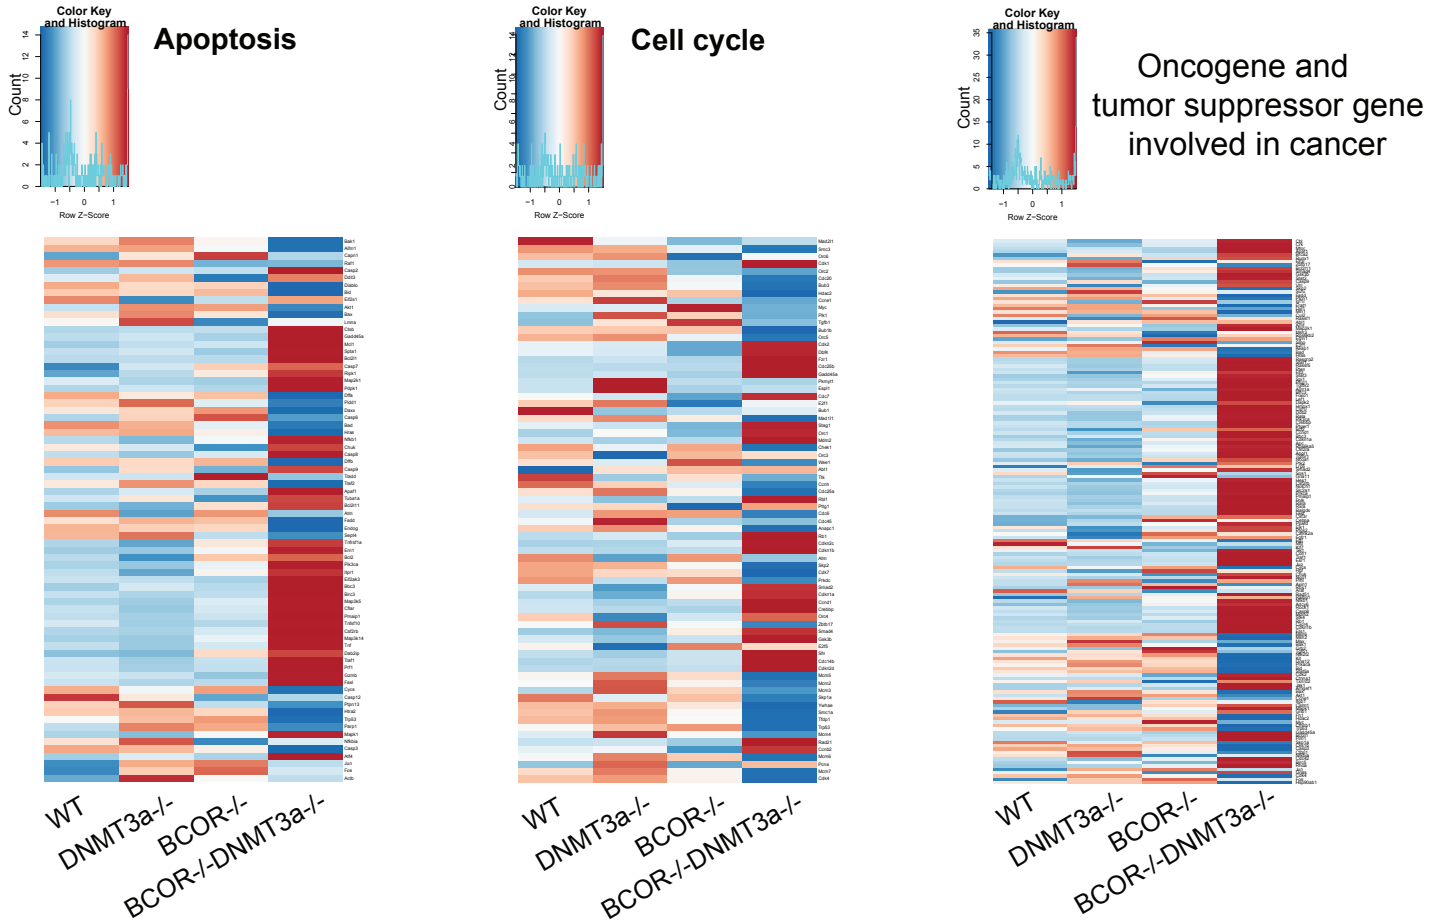

Supplementary Figure 9.

**A**

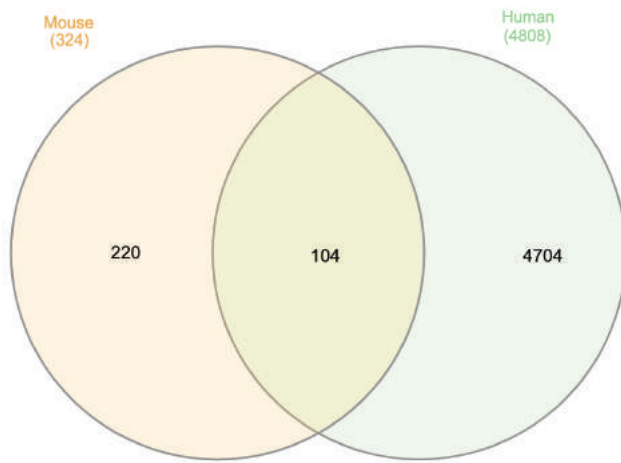

**B**

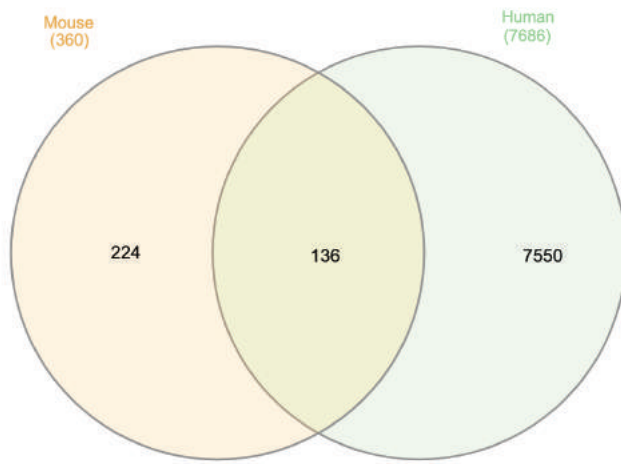

**Supplementary Figure 10.**



A

# PCA

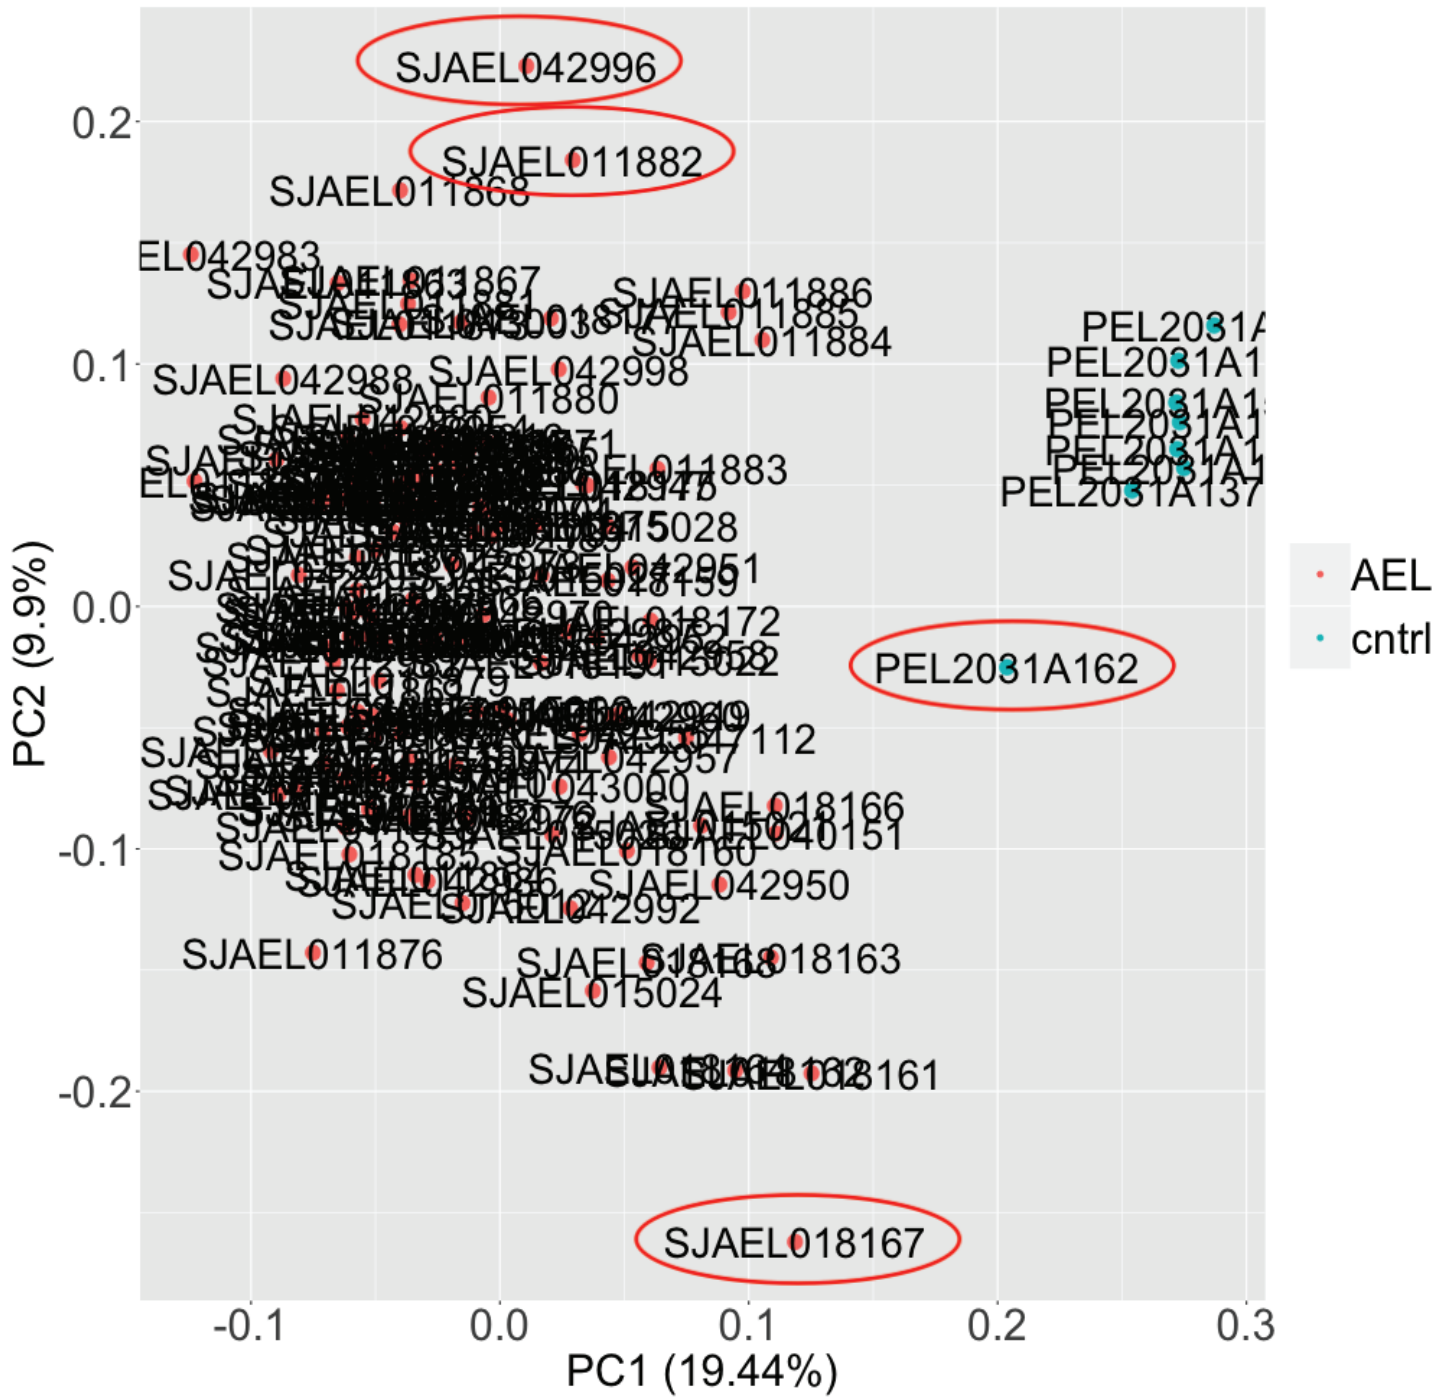

Supplementary Figure 11.

| BCOR/DNMT3a CRE+ |             | BCOR CRE+     |             | DNMT3a CRE+ |              |
|------------------|-------------|---------------|-------------|-------------|--------------|
| GENE ID          | FOLD CHANGE | GENE ID       | FOLD CHANGE | GENE ID     | FOLD CHANGE  |
| Cd22             | 6,051428474 | Gm5643        | 3,891295597 | Cd5         | 1,875942473  |
| Btnl10           | 5,624047489 | Lilr4b        | 3,416379686 | Loxl2       | -1,681735849 |
| Hs3st3b1         | 5,410814883 | Aspa          | 3,115191852 | Arg2        | -1,769578016 |
| Pou2af1          | 5,191041588 | C030013G03Rik | 2,674060508 | Klf6        | -1,794407679 |
| Rhag             | 5,099746969 | Dusp9         | 2,66270129  | Moap1       | -1,972707434 |
| Cldn13           | 4,681441382 | Emp1          | 2,635018659 | Klf2        | -2,211169919 |
| Il4i1            | 4,588355751 | Plk2          | 2,604749555 | Spata18     | -2,426293898 |
| Skap1            | 4,57034121  | Slco2a1       | 2,57636708  |             |              |
| Rhd              | 4,53263566  | Thbs1         | 2,44828131  |             |              |
| Plcd3            | 4,358039191 | Alox15        | 2,414319691 |             |              |
| Dnase1l3         | 4,215280285 | Slamf1        | 2,414231523 |             |              |
| Cd38             | 4,185921322 | Gm6307        | 2,308680079 |             |              |
| Tspo2            | 3,946306219 | Arhgap22      | 2,305834705 |             |              |
| St6gal1          | 3,924071205 | Cyp11a1       | 2,300181291 |             |              |
| Sdc4             | 3,915052328 | Dusp5         | 2,210232778 |             |              |
| Plxdc1           | 3,888202839 | Ccdc30        | 2,203950222 |             |              |
| Agtr1a           | 3,707043489 | Col1a2        | 2,198138286 |             |              |
| Cp               | 3,609202952 | Akr1c12       | 2,16506574  |             |              |
| Ntn4             | 3,59154995  | Car12         | 2,129680003 |             |              |
| Tulp4            | 3,409609859 | Gem           | 2,072195549 |             |              |
| Arntl2           | 3,407305285 | Ankrd29       | 2,060273368 |             |              |
| Mt2              | 3,33657933  | Rgs8          | 2,058753    |             |              |
| Fn3k             | 3,19357122  | 9230110C19Rik | 2,046612496 |             |              |
| Epas1            | 3,066367548 | Raver2        | 2,046104761 |             |              |
| Mpp2             | 3,055299337 | Angptl2       | 2,041461767 |             |              |
| Ets1             | 2,994242363 | Nlrp1b        | 2,000692604 |             |              |
| Fam222a          | 2,946643704 | Nlrc3         | 1,977629847 |             |              |
| Slc22a23         | 2,945596666 | Arhgef9       | 1,972828005 |             |              |
| Prf1             | 2,905640791 | Uchl1         | 1,954301853 |             |              |
| Tmem120b         | 2,820923469 | Cdon          | 1,934162901 |             |              |
| St3gal5          | 2,796313924 | Gprin3        | 1,931911894 |             |              |
| Cmklr1           | 2,769208897 | Arpp21        | 1,922938108 |             |              |
| Lefty1           | 2,75299398  | Apoo          | 1,911385602 |             |              |
| Tmc8             | 2,675436319 | Tert          | 1,888651417 |             |              |
| Aldh3b1          | 2,672048132 | Ovgp1         | 1,877939054 |             |              |
| Mgst3            | 2,627215952 | C1qtnf6       | 1,87504273  |             |              |
| Ppap2b           | 2,619608325 | Dcbld2        | 1,864916323 |             |              |
| Traf3ip2         | 2,581165509 | Lama5         | 1,806027992 |             |              |
| Aqp1             | 2,579383051 | Klhl4         | 1,803649456 |             |              |
| Nxpe4            | 2,5388189   | Tssk4         | 1,801796766 |             |              |

|               |             |           |              |  |  |
|---------------|-------------|-----------|--------------|--|--|
| Pirb          | 2,525084868 | Gm13154   | 1,799823583  |  |  |
| Ankrd33b      | 2,496933148 | Fstl1     | 1,791093983  |  |  |
| Ctss          | 2,47750782  | Itgae     | 1,790833253  |  |  |
| Ces2g         | 2,456750437 | C1ra      | 1,783334499  |  |  |
| Spire1        | 2,448143398 | Kcnp4     | 1,76977694   |  |  |
| Gpc4          | 2,438148839 | Il18r1    | 1,758422807  |  |  |
| Tmem243       | 2,404197074 | Vash2     | 1,74145478   |  |  |
| Fam212b       | 2,396407298 | Synpo     | 1,73876946   |  |  |
| Dennd2c       | 2,334822391 | Pkib      | 1,732064021  |  |  |
| Ankrd61       | 2,286262569 | Tjp1      | 1,714130897  |  |  |
| Abcb10        | 2,245081653 | Pcdhb17   | 1,668774958  |  |  |
| Nrp1          | 2,235061618 | Adamts6   | 1,654446025  |  |  |
| Asprv1        | 2,230720629 | Vps37d    | 1,625463151  |  |  |
| 2010016118Rik | 2,219212236 | Rab36     | 1,613793788  |  |  |
| Pik3ap1       | 2,154118255 | Rapgef4   | 1,613240575  |  |  |
| Unc93b1       | 2,144794187 | Gm12657   | 1,597984146  |  |  |
| Tlr12         | 2,142345834 | Obscn     | 1,581555174  |  |  |
| Snn           | 2,049210525 | Ifi203    | 1,573931828  |  |  |
| Gimap7        | 2,04532921  | Tnfrsf10b | 1,571793614  |  |  |
| Kif19a        | 2,034591598 | Sgsm1     | 1,562391288  |  |  |
| Eif2ak3       | 2,015782984 | Gimap5    | 1,542304396  |  |  |
| Stx11         | 2,009799893 | Cd69      | 1,534075908  |  |  |
| Gata1         | 2,000695225 | Ar        | 1,528640512  |  |  |
| Samd14        | 1,963824095 | Btla      | 1,527080512  |  |  |
| Bcl2l1        | 1,953521375 | Rundc3b   | 1,52077885   |  |  |
| D8Ertd82e     | 1,935004237 | Lca5      | 1,514247299  |  |  |
| Gsn           | 1,9269306   | Plxdc2    | 1,510964692  |  |  |
| H2-T24        | 1,923396186 | Cd33      | 1,505582193  |  |  |
| Evl           | 1,902930062 | Med21     | -1,502485344 |  |  |
| Hemgn         | 1,899573315 | Tlcd1     | -1,509657938 |  |  |
| Ln timer      | 1,896235003 | Phyhip    | -1,522140431 |  |  |
| Camk2d        | 1,877510493 | Emc9      | -1,544302843 |  |  |
| Aff1          | 1,834640415 | Clec1b    | -1,573527409 |  |  |
| Vav2          | 1,832591609 | Cebpa     | -1,588909669 |  |  |
| Pou2f2        | 1,807589675 | Baiap3    | -1,63141075  |  |  |
| Xdh           | 1,795301395 | Mmp14     | -1,656587025 |  |  |
| Sgk1          | 1,793821408 | B3gnt8    | -1,668211756 |  |  |
| Aldh1a7       | 1,785119572 | Spsb4     | -1,681596102 |  |  |
| Pde8a         | 1,769898593 | Wnt10b    | -1,68302016  |  |  |
| Irf5          | 1,769677613 | Depdc7    | -1,685767691 |  |  |
| B430306N03Rik | 1,754641841 | Ap3s1     | -1,719988113 |  |  |
| Gadd45g       | 1,75258665  | Tubb3     | -1,747919289 |  |  |
| Otub2         | 1,746247559 | Slc26a8   | -1,75512699  |  |  |

|               |              |               |              |  |  |
|---------------|--------------|---------------|--------------|--|--|
| Dclre1c       | 1,735503677  | Hvcn1         | -1,758467741 |  |  |
| H2-Ab1        | 1,725876559  | F630028O10Rik | -1,759555267 |  |  |
| Zbp1          | 1,6948468    | Cxadr         | -1,77304009  |  |  |
| Tecpr1        | 1,692445989  | Tlr1          | -1,868157945 |  |  |
| Mir6236       | 1,688595001  | Slc4a8        | -1,880628665 |  |  |
| Ctsb          | 1,664651608  | Mgst2         | -1,904109634 |  |  |
| AA986860      | 1,632129152  | Dab2          | -1,950433101 |  |  |
| Traf4         | 1,628713208  | Tnfsf13       | -1,963460811 |  |  |
| Cysltr1       | 1,613836913  | Wfdc21        | -1,977865936 |  |  |
| B3gat2        | 1,588186097  | Dsp           | -2,012923659 |  |  |
| Klf3          | 1,578631414  | Clec4a2       | -2,050871594 |  |  |
| Mthfd2        | 1,559895989  | Ltb4r1        | -2,055939112 |  |  |
| Dennd4a       | 1,551899512  | Syng1         | -2,06800894  |  |  |
| Neu1          | 1,550630938  | Abcb9         | -2,069434008 |  |  |
| Lbh           | 1,545987602  | Cebpd         | -2,161119636 |  |  |
| Slc25a38      | 1,541871481  | Ptgir         | -2,173358305 |  |  |
| Ubac1         | 1,537234022  | Lin28a        | -2,482915978 |  |  |
| Mylip         | 1,513692033  | Trem3         | -2,721898823 |  |  |
| Man2a1        | 1,511907131  | G0s2          | -3,029256756 |  |  |
| Arhgef12      | 1,507343819  | Fcnb          | -3,149815204 |  |  |
| 1810011H11Rik | -1,506898758 | Ankrd63       | -3,992592001 |  |  |
| Stk26         | -1,512998696 |               |              |  |  |
| Extl2         | -1,513477738 |               |              |  |  |
| Fgd4          | -1,514013314 |               |              |  |  |
| Heatr5a       | -1,518265889 |               |              |  |  |
| Lhfp12        | -1,519159788 |               |              |  |  |
| 2010204K13Rik | -1,529766345 |               |              |  |  |
| Ltbr          | -1,532714125 |               |              |  |  |
| Gstk1         | -1,540624553 |               |              |  |  |
| Trip6         | -1,544809865 |               |              |  |  |
| 4921507P07Rik | -1,552222925 |               |              |  |  |
| Dmwd          | -1,553137236 |               |              |  |  |
| Vkorc1        | -1,558658149 |               |              |  |  |
| Ifitm2        | -1,558766094 |               |              |  |  |
| Zfp763        | -1,560288841 |               |              |  |  |
| Xpc           | -1,565111297 |               |              |  |  |
| P3h1          | -1,569818149 |               |              |  |  |
| Galm          | -1,570012405 |               |              |  |  |
| Guca1a        | -1,573371669 |               |              |  |  |
| Tmem231       | -1,584783954 |               |              |  |  |
| Vsig10l       | -1,587671007 |               |              |  |  |
| Padi4         | -1,591238719 |               |              |  |  |
| Cryz          | -1,593490518 |               |              |  |  |

|               |              |  |  |  |  |
|---------------|--------------|--|--|--|--|
| Ccdc40        | -1,59432913  |  |  |  |  |
| Trem12        | -1,597706454 |  |  |  |  |
| Enpp5         | -1,598189567 |  |  |  |  |
| Aldh7a1       | -1,599516118 |  |  |  |  |
| Jpx           | -1,601029337 |  |  |  |  |
| Rbpms         | -1,602012407 |  |  |  |  |
| Tead2         | -1,606809602 |  |  |  |  |
| Rasl12        | -1,607465264 |  |  |  |  |
| 2900005J15Rik | -1,609109843 |  |  |  |  |
| Gatsl2        | -1,614901304 |  |  |  |  |
| 1500009L16Rik | -1,616723267 |  |  |  |  |
| Rorc          | -1,617174219 |  |  |  |  |
| Irak1bp1      | -1,617594455 |  |  |  |  |
| Syde1         | -1,617791783 |  |  |  |  |
| Tmem205       | -1,621526498 |  |  |  |  |
| Gabarapl1     | -1,622860693 |  |  |  |  |
| Zc4h2         | -1,626833461 |  |  |  |  |
| Pbx4          | -1,627947031 |  |  |  |  |
| Rab11fip3     | -1,628677051 |  |  |  |  |
| Setmar        | -1,63422751  |  |  |  |  |
| Pcyox1l       | -1,637585625 |  |  |  |  |
| Hsd3b7        | -1,643266706 |  |  |  |  |
| Ugt1a7c       | -1,648703912 |  |  |  |  |
| 9930014A18Rik | -1,648875308 |  |  |  |  |
| Atp6v1g2      | -1,652858083 |  |  |  |  |
| Tle2          | -1,653312325 |  |  |  |  |
| Atg4c         | -1,654387005 |  |  |  |  |
| Dfna5         | -1,658216794 |  |  |  |  |
| 4930520O04Rik | -1,658994773 |  |  |  |  |
| Rec8          | -1,659224533 |  |  |  |  |
| Large         | -1,661332442 |  |  |  |  |
| MacroD1       | -1,664198832 |  |  |  |  |
| Dhdh          | -1,675686222 |  |  |  |  |
| Paqr7         | -1,679872204 |  |  |  |  |
| 4931428F04Rik | -1,687039502 |  |  |  |  |
| Klhl3         | -1,68743743  |  |  |  |  |
| Tmem181b-ps   | -1,688493599 |  |  |  |  |
| Megf8         | -1,692441744 |  |  |  |  |
| Tet1          | -1,697583293 |  |  |  |  |
| Flt3          | -1,701060035 |  |  |  |  |
| Sirt3         | -1,703305016 |  |  |  |  |
| Gpc2          | -1,706184814 |  |  |  |  |
| Gm5595        | -1,708016196 |  |  |  |  |

|               |              |  |  |  |  |
|---------------|--------------|--|--|--|--|
| Igdcc4        | -1,713658425 |  |  |  |  |
| Cpq           | -1,717492174 |  |  |  |  |
| I730030J21Rik | -1,733300359 |  |  |  |  |
| Trim47        | -1,746015634 |  |  |  |  |
| Amot          | -1,746540056 |  |  |  |  |
| Acsl3         | -1,748881638 |  |  |  |  |
| Vegfc         | -1,750122777 |  |  |  |  |
| Fscn1         | -1,759777677 |  |  |  |  |
| Cacna1a       | -1,760428214 |  |  |  |  |
| Nos1ap        | -1,770513193 |  |  |  |  |
| Msl3l2        | -1,774553112 |  |  |  |  |
| Frmd7         | -1,780397388 |  |  |  |  |
| Lrrc27        | -1,799040472 |  |  |  |  |
| Supt3         | -1,799908001 |  |  |  |  |
| D5Ertd605e    | -1,806622315 |  |  |  |  |
| Pank1         | -1,807270862 |  |  |  |  |
| Adgrd1        | -1,830687533 |  |  |  |  |
| Ngfrap1       | -1,835256059 |  |  |  |  |
| Pcdhgb4       | -1,836259858 |  |  |  |  |
| Mthfd2l       | -1,847115757 |  |  |  |  |
| Acot7         | -1,849991031 |  |  |  |  |
| Pak1          | -1,85799089  |  |  |  |  |
| Tfr2          | -1,860762028 |  |  |  |  |
| Ybx2          | -1,862847087 |  |  |  |  |
| Tcp11         | -1,863073086 |  |  |  |  |
| Mtss1l        | -1,865669191 |  |  |  |  |
| Kifap3        | -1,878409617 |  |  |  |  |
| Itm2a         | -1,881105081 |  |  |  |  |
| Kcnd1         | -1,882875402 |  |  |  |  |
| Ltc4s         | -1,885470699 |  |  |  |  |
| Lmo2          | -1,889861965 |  |  |  |  |
| B230118H07Rik | -1,90164268  |  |  |  |  |
| Efr3b         | -1,902695763 |  |  |  |  |
| Neto2         | -1,910605137 |  |  |  |  |
| Deptor        | -1,911583726 |  |  |  |  |
| Ccl27a        | -1,913398126 |  |  |  |  |
| Adrbk2        | -1,927439938 |  |  |  |  |
| Gm7694        | -1,928492831 |  |  |  |  |
| Ocrl          | -1,932424757 |  |  |  |  |
| Pcp4l1        | -1,94364981  |  |  |  |  |
| Kctd1         | -1,956493121 |  |  |  |  |
| Rai14         | -1,958757616 |  |  |  |  |
| Pemt          | -1,965476717 |  |  |  |  |

|               |              |  |  |  |  |
|---------------|--------------|--|--|--|--|
| Tcf15         | -1,973992638 |  |  |  |  |
| Snx7          | -1,987553442 |  |  |  |  |
| Scamp1        | -1,988209098 |  |  |  |  |
| Itih5         | -2,005844003 |  |  |  |  |
| Gm15910       | -2,008615844 |  |  |  |  |
| Med12l        | -2,018230574 |  |  |  |  |
| lspd          | -2,02782076  |  |  |  |  |
| Syngap1       | -2,036377806 |  |  |  |  |
| Scube3        | -2,044562725 |  |  |  |  |
| Lrfr4         | -2,044809506 |  |  |  |  |
| Smo           | -2,049219757 |  |  |  |  |
| Eid2          | -2,055757529 |  |  |  |  |
| Dlg4          | -2,057721937 |  |  |  |  |
| Glis2         | -2,062932216 |  |  |  |  |
| Gjb3          | -2,066060274 |  |  |  |  |
| Tspan4        | -2,067561929 |  |  |  |  |
| Rnf180        | -2,069424608 |  |  |  |  |
| Ggt5          | -2,071605629 |  |  |  |  |
| Fsd1l         | -2,075645871 |  |  |  |  |
| Mfge8         | -2,07970996  |  |  |  |  |
| Lonrf3        | -2,092714541 |  |  |  |  |
| Mylk          | -2,100232434 |  |  |  |  |
| Slc25a43      | -2,104264801 |  |  |  |  |
| Tceal8        | -2,110035658 |  |  |  |  |
| Zfp286        | -2,111085375 |  |  |  |  |
| Csf3r         | -2,122871431 |  |  |  |  |
| Nlgn2         | -2,129168503 |  |  |  |  |
| Hook1         | -2,13052496  |  |  |  |  |
| Rabl2         | -2,13867182  |  |  |  |  |
| Mb21d2        | -2,138772107 |  |  |  |  |
| Ccdc149       | -2,139016189 |  |  |  |  |
| Mansc1        | -2,140945018 |  |  |  |  |
| Decr1         | -2,141137786 |  |  |  |  |
| Armcx3        | -2,142223194 |  |  |  |  |
| Lekr1         | -2,147671609 |  |  |  |  |
| Kcnab1        | -2,150037465 |  |  |  |  |
| Def8          | -2,153270329 |  |  |  |  |
| 5730409E04Rik | -2,176743289 |  |  |  |  |
| Spred3        | -2,193968142 |  |  |  |  |
| Slc16a7       | -2,194966807 |  |  |  |  |
| Slc24a3       | -2,211381352 |  |  |  |  |
| Tacstd2       | -2,213818395 |  |  |  |  |
| Upp1          | -2,216255926 |  |  |  |  |

|           |              |  |  |  |  |
|-----------|--------------|--|--|--|--|
| Dctd      | -2,217250816 |  |  |  |  |
| Them7     | -2,218325611 |  |  |  |  |
| My110     | -2,219458009 |  |  |  |  |
| Nav1      | -2,223188558 |  |  |  |  |
| Kdelc2    | -2,223678516 |  |  |  |  |
| Zfp937    | -2,226183234 |  |  |  |  |
| Smim10l2a | -2,23679037  |  |  |  |  |
| Hacd4     | -2,240133951 |  |  |  |  |
| Dnmt3b    | -2,242024992 |  |  |  |  |
| Pglyrp2   | -2,248197902 |  |  |  |  |
| Mtfr2     | -2,249578834 |  |  |  |  |
| Efna4     | -2,253218926 |  |  |  |  |
| Samsn1    | -2,254635741 |  |  |  |  |
| Camk1     | -2,260058054 |  |  |  |  |
| Aldh5a1   | -2,260912392 |  |  |  |  |
| Tcp11l1   | -2,264311844 |  |  |  |  |
| Anxa4     | -2,264552197 |  |  |  |  |
| Dapk1     | -2,26841476  |  |  |  |  |
| Kit       | -2,269918647 |  |  |  |  |
| H1fx      | -2,279516407 |  |  |  |  |
| Dapp1     | -2,281578163 |  |  |  |  |
| Npl       | -2,32312586  |  |  |  |  |
| Slc22a17  | -2,323849296 |  |  |  |  |
| Fam171a2  | -2,324353729 |  |  |  |  |
| Clec4d    | -2,325594542 |  |  |  |  |
| Ctxn1     | -2,328269074 |  |  |  |  |
| Gnat2     | -2,33857606  |  |  |  |  |
| Psma8     | -2,345248799 |  |  |  |  |
| Zfp608    | -2,367899141 |  |  |  |  |
| Bbs7      | -2,36814161  |  |  |  |  |
| Phldb2    | -2,368363152 |  |  |  |  |
| Ica1      | -2,370460417 |  |  |  |  |
| Npr2      | -2,376918733 |  |  |  |  |
| Fam131a   | -2,384070239 |  |  |  |  |
| Vdr       | -2,390316489 |  |  |  |  |
| Rbpms2    | -2,409356961 |  |  |  |  |
| Dock7     | -2,41054075  |  |  |  |  |
| Gnb5      | -2,4130371   |  |  |  |  |
| Ak4       | -2,419557649 |  |  |  |  |
| Osbp1a    | -2,420568265 |  |  |  |  |
| Tmem40    | -2,42074159  |  |  |  |  |
| Zfp184    | -2,42329581  |  |  |  |  |
| Bicd1     | -2,443549322 |  |  |  |  |



|               |              |  |  |  |  |
|---------------|--------------|--|--|--|--|
| Fam110b       | -2,449157055 |  |  |  |  |
| Ikzf2         | -2,449469345 |  |  |  |  |
| 4930515G01Rik | -2,451370353 |  |  |  |  |
| Tdrkh         | -2,461410965 |  |  |  |  |
| Rgs18         | -2,46625499  |  |  |  |  |
| Arhgap32      | -2,467656558 |  |  |  |  |
| Fabp5         | -2,474098766 |  |  |  |  |
| Slc25a27      | -2,475240959 |  |  |  |  |
| Egln3         | -2,476099313 |  |  |  |  |
| Sema4g        | -2,47686237  |  |  |  |  |
| Sdsl          | -2,480182433 |  |  |  |  |
| Zfp30         | -2,48102548  |  |  |  |  |
| Zfp248        | -2,492582832 |  |  |  |  |
| Clic5         | -2,498141365 |  |  |  |  |
| Prdm16        | -2,499100869 |  |  |  |  |
| Tfec          | -2,499323299 |  |  |  |  |
| Snx31         | -2,502030709 |  |  |  |  |
| Maged2        | -2,502940961 |  |  |  |  |
| Clnk          | -2,506332419 |  |  |  |  |
| Adgra2        | -2,511854177 |  |  |  |  |
| Tas1r1        | -2,517631913 |  |  |  |  |
| Kcnk12        | -2,519975013 |  |  |  |  |
| Ociad2        | -2,521085774 |  |  |  |  |
| Sall2         | -2,530193645 |  |  |  |  |
| Ndrg1         | -2,534492084 |  |  |  |  |
| Ms4a2         | -2,541193888 |  |  |  |  |
| Nudt12        | -2,544655584 |  |  |  |  |
| Gprc5b        | -2,549743415 |  |  |  |  |
| Rbp1          | -2,552536148 |  |  |  |  |
| Irf6          | -2,553364609 |  |  |  |  |
| Ptrf          | -2,553563335 |  |  |  |  |
| Ier3          | -2,557075164 |  |  |  |  |
| Pcdhgb6       | -2,564191403 |  |  |  |  |
| Rusc2         | -2,57077207  |  |  |  |  |
| Adam22        | -2,578712134 |  |  |  |  |
| Fsbp          | -2,586128129 |  |  |  |  |
| Tpmt          | -2,593686421 |  |  |  |  |
| Fam92a        | -2,599436596 |  |  |  |  |
| Lincred1      | -2,60020807  |  |  |  |  |
| Hspa12b       | -2,609081408 |  |  |  |  |
| Ccl9          | -2,620505352 |  |  |  |  |
| Shank3        | -2,629899383 |  |  |  |  |
| Six5          | -2,632527391 |  |  |  |  |

|         |              |  |  |  |  |
|---------|--------------|--|--|--|--|
| Il17rc  | -2,634770857 |  |  |  |  |
| Slco3a1 | -2,650318345 |  |  |  |  |
| Ccm2l   | -2,659052934 |  |  |  |  |
| Copz2   | -2,666375721 |  |  |  |  |
| Apln    | -2,667217002 |  |  |  |  |
| Fam169a | -2,6711201   |  |  |  |  |
| Zfp532  | -2,673089314 |  |  |  |  |
| Camk2a  | -2,673464929 |  |  |  |  |
| Plag1   | -2,682220774 |  |  |  |  |
| Tmem14a | -2,682430565 |  |  |  |  |
| P3h3    | -2,68354975  |  |  |  |  |
| Il1r1   | -2,686583341 |  |  |  |  |
| Mmp15   | -2,686958558 |  |  |  |  |
| Ccdc112 | -2,688990145 |  |  |  |  |
| Pde4c   | -2,719742706 |  |  |  |  |
| Gm14420 | -2,72244453  |  |  |  |  |
| Slc7a4  | -2,726437105 |  |  |  |  |
| Dnaaf3  | -2,755598853 |  |  |  |  |
| Zfp521  | -2,757813621 |  |  |  |  |
| Bex6    | -2,766385107 |  |  |  |  |
| Selp    | -2,766558956 |  |  |  |  |
| Kcnh2   | -2,773983036 |  |  |  |  |
| Rtn4r   | -2,775254564 |  |  |  |  |
| Cd27    | -2,776589716 |  |  |  |  |
| Ltbp3   | -2,776625045 |  |  |  |  |
| Pkd2    | -2,777283658 |  |  |  |  |
| Pter    | -2,780369889 |  |  |  |  |
| Slc24a5 | -2,788787983 |  |  |  |  |
| Cdk18   | -2,795809518 |  |  |  |  |
| Fgd1    | -2,796550219 |  |  |  |  |
| Pafah2  | -2,797468127 |  |  |  |  |
| Fgfr3   | -2,803628626 |  |  |  |  |
| Zfp109  | -2,823123627 |  |  |  |  |
| Mycbpap | -2,824038892 |  |  |  |  |
| Hoxa9   | -2,839698907 |  |  |  |  |
| Epha7   | -2,848029583 |  |  |  |  |
| Abca4   | -2,849042665 |  |  |  |  |
| Vash1   | -2,855583352 |  |  |  |  |
| Gspt2   | -2,875726357 |  |  |  |  |
| Cxx1c   | -2,880213935 |  |  |  |  |
| Zc2hc1a | -2,882785164 |  |  |  |  |
| Slc18a1 | -2,891582815 |  |  |  |  |
| Hoxa10  | -2,905711362 |  |  |  |  |

|          |              |  |  |  |  |
|----------|--------------|--|--|--|--|
| Cyp2j9   | -2,918871356 |  |  |  |  |
| Zfp57    | -2,934417448 |  |  |  |  |
| Rab17    | -2,943610375 |  |  |  |  |
| Rbm11    | -2,960597936 |  |  |  |  |
| Prr36    | -2,964225859 |  |  |  |  |
| Gm973    | -2,976745522 |  |  |  |  |
| Akr1e1   | -2,999505319 |  |  |  |  |
| Tmem215  | -3,005859705 |  |  |  |  |
| Afap1l1  | -3,0118149   |  |  |  |  |
| Nkx2-3   | -3,021908797 |  |  |  |  |
| Maoa     | -3,024798667 |  |  |  |  |
| Sorbs3   | -3,032738104 |  |  |  |  |
| Clstn3   | -3,035451876 |  |  |  |  |
| Ephb6    | -3,038052341 |  |  |  |  |
| Tmem121  | -3,040723387 |  |  |  |  |
| Pdgfrb   | -3,05759197  |  |  |  |  |
| Hgf      | -3,059208157 |  |  |  |  |
| Ccdc158  | -3,062474782 |  |  |  |  |
| Arhgap6  | -3,068011413 |  |  |  |  |
| Slc25a13 | -3,088571252 |  |  |  |  |
| Fkbp9    | -3,092250605 |  |  |  |  |
| Tcam1    | -3,117906959 |  |  |  |  |
| Ehbp1    | -3,123810174 |  |  |  |  |
| Gata2    | -3,138656162 |  |  |  |  |
| Slc18a2  | -3,140052334 |  |  |  |  |
| Slc27a6  | -3,14592089  |  |  |  |  |
| Ttc8     | -3,149256459 |  |  |  |  |
| Il15     | -3,160482267 |  |  |  |  |
| Ecsr     | -3,171821098 |  |  |  |  |
| Ifitm1   | -3,179178662 |  |  |  |  |
| Il31ra   | -3,182984109 |  |  |  |  |
| Stxbp4   | -3,197134687 |  |  |  |  |
| Sema3d   | -3,201049686 |  |  |  |  |
| Serf1    | -3,203394304 |  |  |  |  |
| Hgfac    | -3,208798819 |  |  |  |  |
| Nlrp10   | -3,211994109 |  |  |  |  |
| Procr    | -3,22265641  |  |  |  |  |
| Tmem98   | -3,227448566 |  |  |  |  |
| Obsl1    | -3,231519864 |  |  |  |  |
| Adgrg1   | -3,233298106 |  |  |  |  |
| Ppp1r26  | -3,236722697 |  |  |  |  |
| Tmem159  | -3,237574628 |  |  |  |  |
| Cldn12   | -3,252521135 |  |  |  |  |

|               |              |  |  |  |  |
|---------------|--------------|--|--|--|--|
| Esam          | -3,252927131 |  |  |  |  |
| Rbfox2        | -3,261326668 |  |  |  |  |
| Muc13         | -3,266924277 |  |  |  |  |
| 5930403L14Rik | -3,267099074 |  |  |  |  |
| Rab38         | -3,272881208 |  |  |  |  |
| 8430408G22Rik | -3,281653613 |  |  |  |  |
| Kcng1         | -3,285900275 |  |  |  |  |
| Pbx1          | -3,28706641  |  |  |  |  |
| Camsap3       | -3,2881548   |  |  |  |  |
| Ppp2r3a       | -3,309748795 |  |  |  |  |
| Zfp93         | -3,315437267 |  |  |  |  |
| Cyp7b1        | -3,33426628  |  |  |  |  |
| Col16a1       | -3,337169606 |  |  |  |  |
| Nhsl1         | -3,340909043 |  |  |  |  |
| Dach1         | -3,343522    |  |  |  |  |
| Hnmt          | -3,346141506 |  |  |  |  |
| Ppp1r9a       | -3,35186361  |  |  |  |  |
| Mamdc2        | -3,364483627 |  |  |  |  |
| Trpc6         | -3,402102751 |  |  |  |  |
| Fam171a1      | -3,409760024 |  |  |  |  |
| Fut7          | -3,432218826 |  |  |  |  |
| Lypd6b        | -3,441383775 |  |  |  |  |
| Gcnt2         | -3,446547249 |  |  |  |  |
| Gng11         | -3,458410142 |  |  |  |  |
| Paqr8         | -3,459831718 |  |  |  |  |
| Fzd3          | -3,500068317 |  |  |  |  |
| Pld6          | -3,515432808 |  |  |  |  |
| Mycn          | -3,516599612 |  |  |  |  |
| Tmprss7       | -3,522672274 |  |  |  |  |
| Adgrg7        | -3,52572204  |  |  |  |  |
| Alpk3         | -3,529398277 |  |  |  |  |
| Tmem150b      | -3,579980493 |  |  |  |  |
| Scml2         | -3,589866832 |  |  |  |  |
| Cdcp1         | -3,599880036 |  |  |  |  |
| Fzd8          | -3,603354031 |  |  |  |  |
| Spns2         | -3,619394834 |  |  |  |  |
| Brsk1         | -3,623800272 |  |  |  |  |
| Aif1l         | -3,624864769 |  |  |  |  |
| Efcc1         | -3,652405817 |  |  |  |  |
| Slc16a11      | -3,665930324 |  |  |  |  |
| 2610305D13Rik | -3,673037951 |  |  |  |  |
| Arhgef28      | -3,674781819 |  |  |  |  |
| Ube2e2        | -3,687709878 |  |  |  |  |

|               |              |  |  |  |  |
|---------------|--------------|--|--|--|--|
| Prex2         | -3,693095748 |  |  |  |  |
| Vldlr         | -3,708183945 |  |  |  |  |
| Cpa3          | -3,729930988 |  |  |  |  |
| Lhcgr         | -3,731437572 |  |  |  |  |
| Rhobtb3       | -3,743011494 |  |  |  |  |
| Cc2d2a        | -3,749775606 |  |  |  |  |
| Ttpa          | -3,765600134 |  |  |  |  |
| Dcaf12l1      | -3,772844577 |  |  |  |  |
| C030034L19Rik | -3,788007434 |  |  |  |  |
| H2afy2        | -3,789377868 |  |  |  |  |
| Ccdc8         | -3,796488367 |  |  |  |  |
| Slc22a18      | -3,804926888 |  |  |  |  |
| Meis1         | -3,809527481 |  |  |  |  |
| Nap1l3        | -3,81538611  |  |  |  |  |
| Gcsam         | -3,830594686 |  |  |  |  |
| Cadps2        | -3,863020388 |  |  |  |  |
| Cyp2j6        | -3,864710312 |  |  |  |  |
| Mdga1         | -3,876694549 |  |  |  |  |
| Mdfi          | -3,899181037 |  |  |  |  |
| F2rl3         | -3,908211334 |  |  |  |  |
| Gucy1a3       | -3,91012318  |  |  |  |  |
| Mpl           | -3,919104647 |  |  |  |  |
| Nrxn1         | -3,92627918  |  |  |  |  |
| Nwd1          | -3,943705186 |  |  |  |  |
| Armcx4        | -3,963057155 |  |  |  |  |
| Slc16a12      | -3,997025183 |  |  |  |  |
| Nynrin        | -3,99826319  |  |  |  |  |
| Casp12        | -4,016426533 |  |  |  |  |
| Gprasp2       | -4,04703371  |  |  |  |  |
| 9030619P08Rik | -4,224524535 |  |  |  |  |
| Napb          | -4,224885435 |  |  |  |  |
| Hmga2         | -4,249797183 |  |  |  |  |
| Otos          | -4,289877733 |  |  |  |  |
| Tek           | -4,335160982 |  |  |  |  |
| Il17re        | -4,34582444  |  |  |  |  |
| Hnf4a         | -4,355656703 |  |  |  |  |
| Ddx4          | -4,376884331 |  |  |  |  |
| Prkg1         | -4,426263459 |  |  |  |  |
| Armcx1        | -4,462947709 |  |  |  |  |
| Hlf           | -4,466472172 |  |  |  |  |
| Mecom         | -4,512791493 |  |  |  |  |
| Btc           | -4,525944228 |  |  |  |  |
| Edar          | -4,571956294 |  |  |  |  |

|               |              |               |              |  |
|---------------|--------------|---------------|--------------|--|
| Tie1          | -4,574175316 |               |              |  |
| Myct1         | -4,619845714 |               |              |  |
| Angpt1        | -4,642006156 |               |              |  |
| Mc5r          | -4,709210782 |               |              |  |
| Cd34          | -4,756717133 |               |              |  |
| Adgrl4        | -4,978389548 |               |              |  |
| Cacnb2        | -5,057105934 |               |              |  |
| Slc22a3       | -5,146233063 |               |              |  |
| Layn          | -5,215136332 |               |              |  |
| Tnip3         | -5,523606351 |               |              |  |
| Pkia          | -5,646131855 |               |              |  |
| Zfp2          | -5,923495215 |               |              |  |
| 2900008C10Rik | 2,588859903  | 2900008C10Rik | -1,988454007 |  |
| Hck           | 2,199588944  | Hck           | -1,583734761 |  |
| Gimap8        | 1,684412837  | Gimap8        | 1,778695551  |  |
| Ric3          | -1,707138871 | Ric3          | 1,59922536   |  |
| Ccl4          | -1,945043308 | Ccl4          | 1,708548564  |  |
| Fzd9          | -2,085927857 | Fzd9          | 1,614323974  |  |
| Klhl30        | -2,432873095 | Klhl30        | 1,776449388  |  |
| Ccl3          | -2,487867526 | Ccl3          | 1,541416384  |  |
| Cpxm1         | -2,587271296 | Cpxm1         | 1,588277842  |  |
| Atp8b5        | -2,632841699 | Atp8b5        | 1,925549561  |  |
| Myo5c         | -2,650052795 | Myo5c         | 2,302114181  |  |
| Rgs1          | -2,684595157 | Rgs1          | 1,792435215  |  |
| Capsl         | -2,694759268 | Capsl         | 2,226428335  |  |
| Plscr4        | -2,702183667 | Plscr4        | 1,854640171  |  |
| Gstm7         | -2,754141125 | Gstm7         | 1,912277501  |  |
| Dntt          | -2,880139795 | Dntt          | 1,574630278  |  |
| Clec4e        | -2,90418373  | Clec4e        | 2,002399     |  |
| Fam135a       | -2,907403046 | Fam135a       | 1,748158887  |  |
| Ctla2a        | -2,93469143  | Ctla2a        | 1,52498167   |  |
| 4930452B06Rik | -3,121800618 | 4930452B06Rik | 4,094473243  |  |
| Apcdd1        | -3,154751729 | Apcdd1        | 2,290770075  |  |
| Morn4         | -3,20768279  | Morn4         | 1,705897245  |  |
| Ttc12         | -3,222317239 | Ttc12         | 2,310801044  |  |
| Tfcp2l1       | -3,356825084 | Tfcp2l1       | 1,805795372  |  |
| Robo4         | -3,598791354 | Robo4         | 1,613216949  |  |

**Table S1: List of differentially expressed genes in the LSK BM cells of BCOR/DNMT3a, BCOR and DNMT3a mice compared to WT controls.**

| BCOR/DNMT3a   |                 | BCOR          |                 | DNMT3a   |                  |
|---------------|-----------------|---------------|-----------------|----------|------------------|
| ID GENE       | LOG FOLD CHANGE | ID GENE       | LOG FOLD CHANGE | ID GENE  | LOG2 FOLD CHANGE |
| Gm21975       | 6,832263445     | Il4i1         | 5,442056048     | Prg2     | 2,216110076      |
| 6430548M08Rik | 5,024646945     | 5930403L14Rik | 3,80258118      | Vcam1    | 1,868791436      |
| S100a6        | 4,814028267     | 2900008C10Rik | 3,237230566     | Pcdhga5  | 1,7434035        |
| Slfn2         | 4,393534463     | Nkx1-2        | 2,949192458     | Rnls     | 1,711680536      |
| Slfn4         | 4,314318743     | Itga9         | 2,705001108     | Nacad    | 1,693088783      |
| Clec4a2       | 4,245449978     | Hoxa10        | 2,55211065      | Catsper2 | -1,68796076      |
| Ccr7          | 4,105442913     | Prdm16        | 2,448756132     | ligp1    | -1,799279557     |
| B430306N03Rik | 4,066108058     | B4galt6       | 2,343327255     | Gm15446  | -2,057893846     |
| Zc3h12d       | 3,92602666      | Cebpa         | 2,259167507     | Gdpd3    | -2,175651432     |
| Filip1l       | 3,794707703     | Fgf3          | 2,132347415     | Klra4    | -2,638044932     |
| Tlr9          | 3,75080541      | Peli2         | 2,107803225     |          |                  |
| Gbp8          | 3,719035215     | Cldn15        | 2,083019534     |          |                  |
| App           | 3,640319432     | Hoxa7         | 1,94972639      |          |                  |
| Fcrla         | 3,627953945     | Rab6b         | 1,925824627     |          |                  |
| Rhoc          | 3,548746364     | Hmga2         | 1,783164286     |          |                  |
| Pirb          | 3,436651945     | B3gnt7        | 1,747769872     |          |                  |
| Rin2          | 3,401133771     | Pcdhgc3       | 1,741183684     |          |                  |
| Map3k8        | 3,387716471     | Mira          | 1,736849316     |          |                  |
| Ptpn22        | 3,269164784     | Ak4           | 1,729611733     |          |                  |
| Pqlc3         | 3,232934918     | Ctbp2         | 1,722066037     |          |                  |
| Hck           | 3,192709471     | Klf2          | 1,700057858     |          |                  |
| Fam102a       | 3,157622644     | Src           | 1,699773001     |          |                  |
| Il1r2         | 3,148843319     | Ms4a3         | 1,694426308     |          |                  |
| Tnfrsf13b     | 3,127629936     | Slc9a2        | 1,680035571     |          |                  |
| Jdp2          | 3,059083659     | A430105I19Rik | 1,665316921     |          |                  |
| Lrrc16a       | 3,019865869     | Zfp516        | 1,658088203     |          |                  |
| Fcer1g        | 2,916698526     | Cap2          | 1,645596738     |          |                  |
| D330041H03Rik | 2,891592291     | Slc35e4       | 1,638924977     |          |                  |
| A630033H20Rik | 2,876925526     | Slc35f2       | 1,617437985     |          |                  |
| Nucb2         | 2,872917624     | Hoxa9         | 1,613901608     |          |                  |
| Gpr65         | 2,863304403     | Gkap1         | 1,567970627     |          |                  |
| Il12rb1       | 2,853924827     | Wdr78         | 1,520169522     |          |                  |
| Csf2rb        | 2,845033855     | Ndrp2         | -1,502648756    |          |                  |
| Sh2d1b1       | 2,834767252     | Clock         | -1,536576273    |          |                  |
| Cd247         | 2,833045969     | 1700048O20Rik | -1,628482819    |          |                  |
| Degs2         | 2,799176218     | Akap2         | -1,64511209     |          |                  |
| Dram1         | 2,735645992     | Xlr4c         | -1,681385693    |          |                  |
| Lck           | 2,691037006     | Hif3a         | -1,684656569    |          |                  |
| Irf2bpl       | 2,68788063      | Slc36a4       | -1,720513588    |          |                  |
| Ly75          | 2,68462492      | Axl           | -1,730626532    |          |                  |
| Appl2         | 2,670636474     | Vwa7          | -1,736990502    |          |                  |

|               |             |               |              |  |  |
|---------------|-------------|---------------|--------------|--|--|
| Lag3          | 2,650188379 | Clgn          | -1,74532398  |  |  |
| Pld4          | 2,639579467 | Bdh1          | -1,775144198 |  |  |
| Hdc           | 2,631745643 | Gm15787       | -1,856720252 |  |  |
| Mylip         | 2,622542221 | Fabp5         | -1,981971402 |  |  |
| Stk39         | 2,605675049 | Scin          | -1,985453824 |  |  |
| Ctsh          | 2,575755639 | Mmp8          | -1,993329613 |  |  |
| Il4ra         | 2,570099789 | Tspan17       | -2,006867067 |  |  |
| Padi2         | 2,567649694 | Plk2          | -2,019739267 |  |  |
| Bhlha15       | 2,489489906 | Prnp          | -2,033677513 |  |  |
| Gpr137b-ps    | 2,439378607 | Mylk3         | -2,045068559 |  |  |
| H2-Q9         | 2,416797827 | Slc30a10      | -2,088683098 |  |  |
| Epsti1        | 2,367855567 | Raver2        | -2,126894291 |  |  |
| Tmem140       | 2,328671974 | Tjp1          | -2,166383698 |  |  |
| Rogdi         | 2,312122769 | Sdc2          | -2,180520272 |  |  |
| Nab2          | 2,237696458 | D330045A20Rik | -2,323084912 |  |  |
| Adora2a       | 2,231224401 | Dkk1          | -2,386688833 |  |  |
| Mefv          | 2,228755988 | Colq          | -2,446142227 |  |  |
| Rab39         | 2,227101683 | Chil1         | -2,516665054 |  |  |
| Gem           | 2,209775542 | Ly6d          | -2,556753199 |  |  |
| Gpr174        | 2,209316067 | Dapk2         | -2,623432162 |  |  |
| Trps1         | 2,198351147 | Susd2         | -2,640618364 |  |  |
| Tbkbp1        | 2,1874883   | Slc52a3       | -2,765941193 |  |  |
| Tcf7          | 2,186460138 | Mmp9          | -2,774278143 |  |  |
| Hivep2        | 2,151339065 | Retnlg        | -2,849167854 |  |  |
| Cd180         | 2,120873328 | Gpr141        | -3,064263635 |  |  |
| Birc3         | 2,085032704 | Spry4         | -3,811634086 |  |  |
| Zbtb4         | 2,084199829 | Klra18        | -7,60293883  |  |  |
| Tnf           | 2,07236756  |               |              |  |  |
| Gabbr1        | 2,045022764 |               |              |  |  |
| Il6ra         | 2,038921186 |               |              |  |  |
| Gadd45b       | 2,035618014 |               |              |  |  |
| Cpd           | 2,02616411  |               |              |  |  |
| Fkbp1b        | 2,007333302 |               |              |  |  |
| Ms4a6c        | 2,004350709 |               |              |  |  |
| 3830408C21Rik | 1,987600728 |               |              |  |  |
| Rbpms         | 1,957277047 |               |              |  |  |
| Itgal         | 1,949220342 |               |              |  |  |
| Bspry         | 1,940342502 |               |              |  |  |
| Bcl6          | 1,937554353 |               |              |  |  |
| D430020J02Rik | 1,935144592 |               |              |  |  |
| Cdk14         | 1,912944682 |               |              |  |  |
| Dennd1c       | 1,909989599 |               |              |  |  |
| Aph1b         | 1,907284027 |               |              |  |  |



|               |             |  |  |  |  |
|---------------|-------------|--|--|--|--|
| Ptprj         | 1,890514882 |  |  |  |  |
| Plekha1       | 1,888195157 |  |  |  |  |
| Mturn         | 1,887579649 |  |  |  |  |
| Ovgp1         | 1,885087922 |  |  |  |  |
| Akr1c12       | 1,877420537 |  |  |  |  |
| Cytip         | 1,876410487 |  |  |  |  |
| Prr5          | 1,861356476 |  |  |  |  |
| Pkp3          | 1,855211125 |  |  |  |  |
| Bcl9l         | 1,854894953 |  |  |  |  |
| Micall1       | 1,841330561 |  |  |  |  |
| H2-K2         | 1,827299495 |  |  |  |  |
| S1pr1         | 1,824845978 |  |  |  |  |
| Relb          | 1,801693717 |  |  |  |  |
| Shisa5        | 1,799236653 |  |  |  |  |
| Zswim6        | 1,792311331 |  |  |  |  |
| Dcbld2        | 1,790498512 |  |  |  |  |
| Cd2ap         | 1,777664252 |  |  |  |  |
| Tnks1bp1      | 1,776545467 |  |  |  |  |
| Gramd3        | 1,767454213 |  |  |  |  |
| Cpne3         | 1,766725359 |  |  |  |  |
| Nlrc4         | 1,759896958 |  |  |  |  |
| Alcam         | 1,720413788 |  |  |  |  |
| Rasgrp4       | 1,716404664 |  |  |  |  |
| Fam105a       | 1,714021967 |  |  |  |  |
| Cd274         | 1,704852788 |  |  |  |  |
| Fndc9         | 1,665277832 |  |  |  |  |
| Trove2        | 1,661874466 |  |  |  |  |
| Atp8b4        | 1,654697095 |  |  |  |  |
| Mllt6         | 1,64003424  |  |  |  |  |
| Alox5ap       | 1,639044444 |  |  |  |  |
| Notch1        | 1,630659692 |  |  |  |  |
| Tnfrsf1b      | 1,609400479 |  |  |  |  |
| Mef2a         | 1,601483716 |  |  |  |  |
| Diap2         | 1,590562671 |  |  |  |  |
| Myadm         | 1,584790333 |  |  |  |  |
| Gm13051       | 1,576498621 |  |  |  |  |
| 1700049G17Rik | 1,568376879 |  |  |  |  |
| Zbtb37        | 1,566947428 |  |  |  |  |
| Pmaip1        | 1,561555607 |  |  |  |  |
| Lmbr1l        | 1,559560527 |  |  |  |  |
| Herc3         | 1,538603162 |  |  |  |  |
| Lats2         | 1,533314682 |  |  |  |  |
| S100a11       | 1,530040665 |  |  |  |  |

|               |              |  |  |  |  |
|---------------|--------------|--|--|--|--|
| Myo1g         | 1,528187445  |  |  |  |  |
| N4bp3         | 1,51794328   |  |  |  |  |
| Tbc1d2        | 1,516383587  |  |  |  |  |
| B630005N14Rik | 1,512786683  |  |  |  |  |
| Kctd11        | 1,505546238  |  |  |  |  |
| Adamts3       | -1,50002051  |  |  |  |  |
| Pter          | -1,502859537 |  |  |  |  |
| Tuft1         | -1,517149199 |  |  |  |  |
| Grhpr         | -1,523474756 |  |  |  |  |
| Dctd          | -1,525156652 |  |  |  |  |
| Lhfp12        | -1,527083008 |  |  |  |  |
| 5730460C07Rik | -1,532877966 |  |  |  |  |
| Pfn4          | -1,546733185 |  |  |  |  |
| Frat2         | -1,557176212 |  |  |  |  |
| Slc25a13      | -1,560675257 |  |  |  |  |
| Rab26os       | -1,57109001  |  |  |  |  |
| Mgmt          | -1,571482981 |  |  |  |  |
| Gorasp1       | -1,572169482 |  |  |  |  |
| Anxa9         | -1,572195049 |  |  |  |  |
| Dnph1         | -1,583467149 |  |  |  |  |
| Mthfd2l       | -1,597822723 |  |  |  |  |
| Pm20d2        | -1,598561281 |  |  |  |  |
| Macrocl1      | -1,619879188 |  |  |  |  |
| Rab4a         | -1,630804457 |  |  |  |  |
| Cnr2          | -1,635224586 |  |  |  |  |
| Gls2          | -1,644507141 |  |  |  |  |
| Wdr60         | -1,647941593 |  |  |  |  |
| Pcyox1l       | -1,648692363 |  |  |  |  |
| Nthl1         | -1,653016277 |  |  |  |  |
| 4933431E20Rik | -1,679805428 |  |  |  |  |
| Selenbp1      | -1,682795629 |  |  |  |  |
| Acyp2         | -1,705604053 |  |  |  |  |
| Hook1         | -1,72090668  |  |  |  |  |
| Rangrf        | -1,726518121 |  |  |  |  |
| Sdsl          | -1,728946756 |  |  |  |  |
| Pdk2          | -1,751540545 |  |  |  |  |
| Gnb4          | -1,755141993 |  |  |  |  |
| Zfp518b       | -1,764967333 |  |  |  |  |
| Il1rl2        | -1,777981835 |  |  |  |  |
| Trip6         | -1,790950171 |  |  |  |  |
| Ptpdc1        | -1,812912076 |  |  |  |  |
| Rac3          | -1,814330833 |  |  |  |  |
| Psmas         | -1,83089864  |  |  |  |  |

|               |              |  |  |  |  |
|---------------|--------------|--|--|--|--|
| Lrig1         | -1,84585262  |  |  |  |  |
| Adgrl1        | -1,847493944 |  |  |  |  |
| Nfia          | -1,889112184 |  |  |  |  |
| Angptl4       | -1,90489061  |  |  |  |  |
| Trib2         | -1,912523917 |  |  |  |  |
| Acsl6         | -1,915940384 |  |  |  |  |
| Gm11837       | -1,940744059 |  |  |  |  |
| Ispd          | -1,952811428 |  |  |  |  |
| Bmp1          | -1,962379577 |  |  |  |  |
| Decr1         | -1,967025558 |  |  |  |  |
| Rasgef1c      | -1,973869179 |  |  |  |  |
| Aqp11         | -1,983152622 |  |  |  |  |
| Cpt1c         | -1,988108908 |  |  |  |  |
| Dapk1         | -1,988899173 |  |  |  |  |
| Akr1e1        | -1,992589319 |  |  |  |  |
| Csrp3         | -1,995506107 |  |  |  |  |
| Igsf3         | -2,003211991 |  |  |  |  |
| Gm14420       | -2,028163808 |  |  |  |  |
| Atp7b         | -2,060042329 |  |  |  |  |
| Tfr2          | -2,062166989 |  |  |  |  |
| Preli2        | -2,106164092 |  |  |  |  |
| Arhgef25      | -2,108533688 |  |  |  |  |
| Rusc2         | -2,11583695  |  |  |  |  |
| Hpn           | -2,134566854 |  |  |  |  |
| Plekha6       | -2,135847995 |  |  |  |  |
| Cxx1c         | -2,156801806 |  |  |  |  |
| Nudt12        | -2,160814894 |  |  |  |  |
| Garem         | -2,174252817 |  |  |  |  |
| Ociad2        | -2,184804227 |  |  |  |  |
| Eda           | -2,198025396 |  |  |  |  |
| Macrod2       | -2,201807478 |  |  |  |  |
| Aldh1a7       | -2,245528221 |  |  |  |  |
| Il1rl1        | -2,264627636 |  |  |  |  |
| Slc7a4        | -2,26856121  |  |  |  |  |
| Epha7         | -2,273519616 |  |  |  |  |
| Arhgap6       | -2,280168533 |  |  |  |  |
| Pdia5         | -2,293609745 |  |  |  |  |
| 9130008F23Rik | -2,320538869 |  |  |  |  |
| H1fx          | -2,358063751 |  |  |  |  |
| Ehbp1         | -2,368846162 |  |  |  |  |
| Spire2        | -2,390951456 |  |  |  |  |
| Gnaz          | -2,412902953 |  |  |  |  |
| Angel1        | -2,437788076 |  |  |  |  |

|          |              |        |              |  |  |
|----------|--------------|--------|--------------|--|--|
| Rnf17    | -2,465991594 |        |              |  |  |
| Lcat     | -2,480401339 |        |              |  |  |
| Scml2    | -2,539196796 |        |              |  |  |
| Top1mt   | -2,563036713 |        |              |  |  |
| Grb10    | -2,5689685   |        |              |  |  |
| Mpped2   | -2,57447003  |        |              |  |  |
| Slc22a3  | -2,589686939 |        |              |  |  |
| Flywch2  | -2,616494299 |        |              |  |  |
| Armcx2   | -2,628533819 |        |              |  |  |
| Chst10   | -2,691579821 |        |              |  |  |
| Lmcd1    | -2,700323504 |        |              |  |  |
| Armcx3   | -2,703689177 |        |              |  |  |
| Armcx1   | -2,704627871 |        |              |  |  |
| Fam132a  | -2,725003666 |        |              |  |  |
| BC051537 | -2,735838602 |        |              |  |  |
| Slc26a1  | -2,81265105  |        |              |  |  |
| Prss50   | -2,814385152 |        |              |  |  |
| Pvrl2    | -2,867546123 |        |              |  |  |
| Tdrkh    | -2,905125844 |        |              |  |  |
| Zfp2     | -2,909921652 |        |              |  |  |
| Vstm5    | -2,954346174 |        |              |  |  |
| Plvap    | -2,971742227 |        |              |  |  |
| Tmem17   | -2,997237029 |        |              |  |  |
| Clstn3   | -3,029252975 |        |              |  |  |
| Sh2d4a   | -3,074435404 |        |              |  |  |
| Slc18b1  | -3,096361843 |        |              |  |  |
| Mtap7d3  | -3,113754465 |        |              |  |  |
| Fkbp9    | -3,123377335 |        |              |  |  |
| Nags     | -3,355777373 |        |              |  |  |
| Dntt     | -3,433819005 |        |              |  |  |
| Il31ra   | -3,54752278  |        |              |  |  |
| Armcx6   | -3,616690113 |        |              |  |  |
| Ptpn13   | -3,668817063 |        |              |  |  |
| Ccdc68   | -3,681614115 |        |              |  |  |
| Zfp583   | -3,696825343 |        |              |  |  |
| Sytl4    | -4,121464795 |        |              |  |  |
| Zg16     | -4,233992958 |        |              |  |  |
| Rgs9bp   | -4,305988861 |        |              |  |  |
| Khdrbs3  | -5,629204643 |        |              |  |  |
| Hopx     | 2,345271103  | Hopx   | -2,344072738 |  |  |
| Lgals7   | -1,636086762 | Lgals7 | -2,040450891 |  |  |
| Asns     | -1,784195226 | Asns   | -1,851857433 |  |  |
| Slc2a8   | -1,832210868 | Slc2a8 | -1,594876159 |  |  |

|         |              |         |              |  |  |
|---------|--------------|---------|--------------|--|--|
| Maoa    | -1,914954048 | Maoa    | -2,384272602 |  |  |
| Meiob   | -2,020971961 | Meiob   | -1,569583432 |  |  |
| Hmgcs2  | -2,314922279 | Hmgcs2  | -2,789336204 |  |  |
| Plekha8 | -2,45548982  | Plekha8 | -1,704617561 |  |  |
| Gsta4   | -2,484415947 | Gsta4   | -1,718822399 |  |  |
| Zdhhc2  | -2,677768348 | Zdhhc2  | -3,493806875 |  |  |
| Ltbp1   | -3,145541092 | Ltbp1   | -2,272428821 |  |  |
| Ephx2   | -3,409325421 | Ephx2   | -3,173159244 |  |  |
| Synpo2  | -3,551785069 | Synpo2  | -2,0072338   |  |  |
| Bbs7    | -3,680718263 | Bbs7    | -1,870235278 |  |  |
| Atp4a   | -4,15929363  | Atp4a   | -3,283997789 |  |  |
| Ranbp17 | -4,279099461 | Ranbp17 | -2,99137887  |  |  |
| Spon2   | -4,874191693 | Spon2   | -1,830830757 |  |  |

**Table S2: List of differentially expressed genes in the MEP BM cells of BCOR/DNMT3a, BCOR and DNMT3a mice compared to WT controls.**
